# Supplementary material for: Semantic ambiguity effects on traditional Chinese character naming: A corpus-based approach
Source: Behav Res Methods. 2017 Nov 9;50(6):2292–304. doi: 10.3758/s13428-017-0993-4 (PMC6267517; doi:10.3758/s13428-017-0993-4)
Supplement: Supplementary file 1 — (XLSX 275 kb) [file 13428_2017_993_MOESM1_ESM.xlsx]

## Sheet: Sheet1
Character	CD	Log CD	SemD	SemVar	SemVarRes	Witin-group distance	Between-group distance
所	7221	3.8586	0.841336	0.777682	-1.32651	0.5415	0.6963
最	6872	3.83708	0.859178	0.79706	-1.2012	0.5585	0.7007
將	8386	3.92355	0.8173	0.775802	-1.42342	0.5322	0.686
卻	5247	3.71991	0.850165	0.801065	-1.02334	0.5565	0.6947
想	4382	3.64167	0.821887	0.797695	-0.934626	0.5469	0.6856
才	5887	3.76989	0.862646	0.774039	-1.22504	0.5498	0.7103
做	5205	3.71642	0.843754	0.774345	-1.15144	0.5439	0.7024
過	4508	3.65398	0.845272	0.779111	-1.04359	0.5453	0.6999
一	3598	3.55606	0.844968	0.790382	-0.855568	0.5539	0.7008
再	5254	3.72049	0.866142	0.771709	-1.17003	0.551	0.714
下	5838	3.76626	0.864549	0.751707	-1.33114	0.5395	0.7177
呢	3883	3.58917	0.818728	0.784414	-0.92986	0.5385	0.6865
從	5855	3.76753	0.862013	0.793148	-1.12688	0.5579	0.7034
被	5407	3.73296	0.848324	0.790348	-1.09419	0.5519	0.6983
可	6084	3.78419	0.826522	0.779671	-1.21632	0.54	0.6926
各	6363	3.80366	0.832683	0.77757	-1.25301	0.5401	0.6946
並	7896	3.89741	0.840734	0.756772	-1.48275	0.5308	0.7014
多	5813	3.7644	0.86742	0.780859	-1.18374	0.5548	0.7105
等	6871	3.83702	0.841638	0.776728	-1.30216	0.5427	0.6987
每	5452	3.73656	0.852324	0.771125	-1.19458	0.5448	0.7065
天	4214	3.62469	0.829152	0.78732	-0.963307	0.5464	0.694
後	6418	3.8074	0.837436	0.782797	-1.23207	0.5424	0.6929
或	5868	3.76849	0.832092	0.789956	-1.14404	0.5427	0.687
用	3908	3.59195	0.853252	0.796705	-0.87253	0.5561	0.698
更	5728	3.758	0.854804	0.792531	-1.11711	0.5539	0.6989
道	1022	3.00945	0.825649	0.763286	-0.253404	0.5343	0.7
已	5551	3.74437	0.832387	0.769806	-1.21168	0.5354	0.6955
啊	1604	3.2052	0.691649	0.753137	-0.567721	0.4802	0.6376
次	5180	3.71433	0.852015	0.73663	-1.33607	0.5289	0.718
跟	3026	3.48087	0.792904	0.7721	-0.845073	0.5258	0.681
讓	5193	3.71542	0.862013	0.786393	-1.09021	0.5548	0.7055
便	2234	3.34908	0.838333	0.787822	-0.589285	0.5473	0.6947
此	4861	3.68673	0.809949	0.796685	-1.00038	0.5384	0.6758
小	3497	3.5437	0.836242	0.80058	-0.788216	0.552	0.6895
給	2893	3.46135	0.848018	0.742403	-0.966353	0.5277	0.7108
沒	2506	3.39898	0.814175	0.775872	-0.715939	0.5338	0.688
像	3604	3.55678	0.840734	0.786083	-0.87791	0.5479	0.697
由	5440	3.7356	0.825359	0.769654	-1.20061	0.5316	0.6907
其	4723	3.67422	0.79915	0.776629	-1.0832	0.5257	0.6769
於	5410	3.7332	0.815025	0.745305	-1.31838	0.5159	0.6922
者	4769	3.67843	0.815593	0.791697	-1.01398	0.5378	0.6793
它	3273	3.51495	0.827689	0.790231	-0.800896	0.5436	0.6879
則	5160	3.71265	0.835945	0.799942	-1.01914	0.5494	0.6868
位	4317	3.63518	0.843754	0.777698	-1.02526	0.544	0.6995
家	3300	3.51851	0.838333	0.730223	-1.10395	0.5197	0.7117
前	4402	3.64365	0.855115	0.781904	-1.01578	0.5496	0.7029
向	3229	3.50907	0.851089	0.776295	-0.862234	0.5469	0.7045
事	3247	3.51148	0.836839	0.776092	-0.8665	0.5421	0.6985
如	3556	3.55096	0.83357	0.794909	-0.826196	0.5465	0.6875
走	1646	3.21643	0.820161	0.77897	-0.45446	0.5371	0.6895
見	1703	3.23121	0.835053	0.781546	-0.461587	0.5438	0.6958
心	2065	3.31492	0.821887	0.769532	-0.634133	0.5299	0.6886
內	3767	3.576	0.825068	0.776713	-0.950376	0.535	0.6888
嗎	1948	3.28959	0.816445	0.765429	-0.620382	0.5296	0.6919
當	3169	3.50092	0.853252	0.794417	-0.76119	0.5549	0.6985
使	3856	3.58614	0.853252	0.780658	-0.944441	0.5481	0.7021
全	3571	3.55279	0.845576	0.735961	-1.12164	0.5229	0.7105
問	1667	3.22194	0.811353	0.786517	-0.424376	0.539	0.6853
新	3414	3.53326	0.825649	0.774296	-0.904784	0.5338	0.6894
吃	1569	3.19562	0.777024	0.758327	-0.529009	0.5077	0.6695
吧	1571	3.19618	0.799697	0.72726	-0.684161	0.5029	0.6915
話	1592	3.20194	0.806041	0.775411	-0.45262	0.5279	0.6808
正	2413	3.38256	0.863597	0.786544	-0.640761	0.5553	0.706
妳	495	2.69461	0.722391	0.744966	0.0799637	0.4884	0.6556
太	2408	3.38166	0.847712	0.769831	-0.722609	0.5425	0.7047
聽	1541	3.1878	0.811916	0.788329	-0.369359	0.5363	0.6803
誰	1283	3.10823	0.828859	0.776287	-0.321936	0.5382	0.6933
手	1226	3.08849	0.855115	0.776474	-0.294404	0.5492	0.7073
外	2813	3.44917	0.837436	0.772668	-0.799516	0.5377	0.6959
間	2034	3.30835	0.850473	0.786665	-0.540129	0.5498	0.6989
比	2257	3.35353	0.854804	0.762207	-0.722588	0.5401	0.7086
叫	1364	3.13481	0.802995	0.773112	-0.373559	0.5302	0.6858
高	2609	3.41647	0.8471	0.773671	-0.75046	0.5442	0.7034
無	2191	3.34064	0.842241	0.789398	-0.570075	0.548	0.6942
些	2011	3.30341	0.851397	0.780582	-0.563704	0.5475	0.7014
本	2945	3.46909	0.820736	0.756045	-0.908982	0.5253	0.6948
真	1797	3.25455	0.823041	0.77274	-0.536806	0.5318	0.6882
該	3165	3.50037	0.821023	0.735127	-1.05512	0.5165	0.7026
呀	989	2.9952	0.709965	0.725896	-0.420015	0.4698	0.6472
先	2147	3.33183	0.865823	0.764525	-0.681816	0.5474	0.716
身	1240	3.09342	0.884722	0.767053	-0.347872	0.5555	0.7242
愛	1264	3.10175	0.807154	0.783402	-0.277841	0.5324	0.6796
知	1346	3.12905	0.892451	0.773637	-0.363172	0.5605	0.7245
頭	1039	3.01662	0.885723	0.763777	-0.260618	0.5516	0.7222
點	1638	3.21431	0.864867	0.75603	-0.565624	0.5423	0.7173
講	1428	3.15473	0.745694	0.757838	-0.476313	0.5076	0.6698
另	2145	3.33143	0.857298	0.762965	-0.689024	0.5414	0.7096
找	1412	3.14983	0.834756	0.762388	-0.447106	0.5339	0.7003
應	2533	3.40364	0.806597	0.742994	-0.885617	0.5117	0.6887
請	1729	3.23779	0.860436	0.710443	-0.823841	0.5177	0.7287
馬	704	2.84757	0.923724	0.734152	-0.179986	0.5501	0.7493
因	2900	3.4624	0.819874	0.794376	-0.70946	0.5424	0.6828
曾	2227	3.34772	0.834459	0.791842	-0.567468	0.5455	0.6889
錢	1139	3.05652	0.806041	0.75416	-0.362213	0.5212	0.6911
條	1276	3.10585	0.866461	0.756433	-0.417407	0.5438	0.7189
口	890	2.94939	0.897909	0.763403	-0.17186	0.5582	0.7312
較	2271	3.35622	0.810791	0.778642	-0.644528	0.5308	0.6817
坐	875	2.94201	0.88306	0.762115	-0.168311	0.5536	0.7264
長	1347	3.12937	0.880744	0.770544	-0.378978	0.5551	0.7204
連	1409	3.14891	0.929962	0.749699	-0.508923	0.5604	0.7475
起	2016	3.30449	0.856673	0.748917	-0.722535	0.5357	0.7153
整	1721	3.23578	0.872895	0.771209	-0.51912	0.5518	0.7155
們	1950	3.29003	0.843754	0.779748	-0.549814	0.5452	0.6992
打	1095	3.03941	0.865823	0.735359	-0.43259	0.5324	0.724
快	1397	3.1452	0.872895	0.743018	-0.537119	0.5401	0.7269
仍	2546	3.40586	0.83062	0.755333	-0.82729	0.5276	0.6985
處	1395	3.14457	0.855737	0.782917	-0.337983	0.5518	0.7048
死	763	2.88252	0.893469	0.734627	-0.224738	0.5412	0.7367
至	2617	3.4178	0.803547	0.739684	-0.921166	0.5109	0.6907
帶	1438	3.15776	0.841035	0.780418	-0.368176	0.5452	0.6986
未	2184	3.33925	0.817015	0.749602	-0.765985	0.5185	0.6917
聲	646	2.81023	0.846795	0.752658	-0.0376753	0.538	0.7148
嗯	484	2.68485	0.626353	0.672012	-0.269463	0.4358	0.6485
句	1046	3.01953	0.825068	0.774662	-0.210452	0.5387	0.6954
別	817	2.91222	0.91364	0.746863	-0.203961	0.5535	0.7411
半	1356	3.13226	0.864867	0.746453	-0.502608	0.5367	0.719
項	2564	3.40892	0.796423	0.741473	-0.9003	0.5065	0.6831
歷	1433	3.15625	0.809388	0.758315	-0.475989	0.5221	0.6885
作	1642	3.21537	0.845272	0.760804	-0.543321	0.5334	0.7011
出	1205	3.08099	0.935168	0.785067	-0.241582	0.5804	0.7393
件	1351	3.13066	0.860751	0.771264	-0.377137	0.5486	0.7113
您	922	2.96473	0.796152	0.698223	-0.516483	0.4912	0.7035
啦	853	2.93095	0.736838	0.68841	-0.519716	0.4728	0.6868
住	946	2.97589	0.909389	0.739119	-0.328275	0.5485	0.7421
笑	609	2.78462	0.84588	0.769678	0.0814438	0.5427	0.7051
成	1371	3.13704	0.918293	0.801349	-0.236216	0.5821	0.7264
臉	644	2.80889	0.856361	0.771453	0.0575491	0.5502	0.7132
即	2008	3.30276	0.817585	0.78021	-0.564677	0.5346	0.6852
歲	1561	3.1934	0.80827	0.761663	-0.50944	0.5241	0.6881
受	1724	3.23654	0.859806	0.786099	-0.446138	0.5553	0.7064
怕	737	2.86747	0.900319	0.753542	-0.110434	0.5531	0.734
國	1702	3.23096	0.785951	0.747879	-0.628568	0.5114	0.6838
若	1907	3.28035	0.829152	0.769419	-0.588095	0.5339	0.6939
常	1760	3.24551	0.853562	0.790166	-0.438022	0.5528	0.6996
令	1613	3.20763	0.853872	0.808075	-0.297953	0.5604	0.6935
邊	977	2.98989	0.896196	0.781788	-0.135084	0.5675	0.7259
分	1420	3.15229	0.855115	0.714167	-0.690069	0.5167	0.7235
月	1820	3.26007	0.837436	0.758395	-0.615549	0.533	0.7028
喝	616	2.78958	0.847406	0.730941	-0.11777	0.5235	0.7162
名	1869	3.27161	0.813044	0.748484	-0.68036	0.5184	0.6926
路	1082	3.03423	0.876148	0.787705	-0.165439	0.5625	0.7141
面	1081	3.03383	0.952336	0.753235	-0.336215	0.5705	0.7574
眼	706	2.8488	0.915424	0.772319	0.0080442	0.5675	0.7348
加	1544	3.18865	0.889747	0.779091	-0.41641	0.5604	0.7193
片	972	2.98767	0.912929	0.774132	-0.170131	0.5686	0.7345
非	1470	3.16732	0.878112	0.780866	-0.378835	0.5591	0.716
水	974	2.98856	0.843754	0.7627	-0.228153	0.539	0.7067
回	919	2.96332	0.892451	0.754502	-0.234869	0.5489	0.7275
學	1025	3.01072	0.879097	0.753136	-0.305565	0.5464	0.7255
言	1486	3.17202	0.872571	0.781347	-0.382782	0.5546	0.7098
放	870	2.93952	0.942334	0.764518	-0.153012	0.574	0.7508
早	918	2.96284	0.948462	0.75992	-0.207301	0.5726	0.7535
隻	800	2.90309	0.811634	0.775483	-0.0494052	0.5333	0.6877
極	1127	3.05192	0.921906	0.768939	-0.282559	0.5684	0.7392
白	482	2.68305	0.896538	0.732643	0.0342946	0.5445	0.7432
座	701	2.84572	0.852633	0.772157	0.0114012	0.548	0.7097
塊	762	2.88195	0.912929	0.733137	-0.231376	0.5489	0.7487
門	618	2.79099	0.924818	0.695187	-0.297366	0.533	0.7667
難	1289	3.11025	0.924453	0.796657	-0.223432	0.5814	0.7298
拿	913	2.96047	0.916497	0.753962	-0.233718	0.5614	0.7446
往	978	2.99034	0.903438	0.769241	-0.198041	0.5617	0.7302
哪	834	2.92117	0.857611	0.725775	-0.320822	0.5288	0.7286
張	822	2.91487	0.937418	0.736036	-0.261342	0.5574	0.7573
同	1182	3.07262	0.927383	0.739668	-0.455934	0.5566	0.7525
敢	789	2.89708	0.928855	0.76271	-0.104786	0.5686	0.7455
買	946	2.97589	0.864549	0.758055	-0.234159	0.5411	0.7138
倒	541	2.7332	0.921181	0.731934	-0.0368297	0.551	0.7528
約	1318	3.11992	0.848018	0.774184	-0.348144	0.5458	0.705
喔	498	2.69723	0.652085	0.682096	-0.236041	0.4465	0.6546
寫	1029	3.01242	0.852633	0.755412	-0.296533	0.5374	0.7114
越	430	2.63347	0.93442	0.743736	0.156261	0.561	0.7543
久	889	2.9489	0.936291	0.747503	-0.250223	0.5613	0.7509
亦	1781	3.25066	0.793174	0.74978	-0.645684	0.5112	0.6818
老	896	2.95231	0.920457	0.784244	-0.0722104	0.5754	0.7337
滿	740	2.86923	0.912929	0.73081	-0.225793	0.5541	0.7582
且	1699	3.23019	0.821023	0.758914	-0.572692	0.5257	0.6927
行	806	2.90634	0.948076	0.750595	-0.177477	0.5679	0.7566
書	993	2.99695	0.807433	0.748344	-0.31081	0.5198	0.6946
開	949	2.97727	0.94424	0.748773	-0.282147	0.5645	0.7539
靠	794	2.89982	0.953895	0.736932	-0.236599	0.5597	0.7595
談	755	2.87795	0.92336	0.772169	-0.0319854	0.5721	0.7409
動	396	2.5977	0.925915	0.721333	0.0931413	0.5454	0.7561
場	1303	3.11494	0.822464	0.743765	-0.492627	0.5219	0.7017
氣	506	2.70415	0.886391	0.736871	0.0268611	0.5402	0.7331
自	1444	3.15957	0.860121	0.762524	-0.459545	0.5449	0.7146
指	681	2.83315	0.950782	0.7537	-0.063387	0.5704	0.7568
山	695	2.84198	0.875822	0.764828	-0.0199921	0.5519	0.7216
總	741	2.86982	0.950007	0.768208	-0.0407119	0.578	0.7524
元	1604	3.2052	0.744004	0.732278	-0.671392	0.4855	0.663
遠	809	2.90795	0.962574	0.736519	-0.249608	0.5641	0.7659
酒	320	2.50515	0.882066	0.693943	0.0817636	0.519	0.7479
竟	569	2.75511	0.925184	0.75278	0.0372351	0.5618	0.7463
段	1081	3.03383	0.921543	0.798243	-0.112522	0.5816	0.7286
嘛	704	2.84757	0.732125	0.725707	-0.221959	0.4929	0.6792
美	994	2.99739	0.911155	0.763355	-0.236798	0.5616	0.7357
課	885	2.94694	0.863279	0.678423	-0.590912	0.5059	0.7457
生	725	2.86034	0.946154	0.749176	-0.122523	0.5684	0.7587
花	895	2.95182	0.917933	0.784485	-0.0703595	0.5744	0.7322
少	913	2.96047	0.940058	0.762676	-0.19041	0.5701	0.7475
海	678	2.83123	0.906228	0.749865	-0.0798634	0.5537	0.7384
進	538	2.73078	0.939302	0.707861	-0.153219	0.543	0.7671
站	824	2.91593	0.955068	0.755556	-0.165752	0.5746	0.7605
變	679	2.83187	0.956245	0.751049	-0.0748381	0.5726	0.7624
字	687	2.83696	0.904134	0.763047	-0.022068	0.56	0.7339
日	1044	3.0187	0.90518	0.745093	-0.356292	0.5504	0.7387
夠	826	2.91698	0.951558	0.74174	-0.235834	0.5635	0.7597
雖	1041	3.01745	0.901356	0.741207	-0.373921	0.5479	0.7392
步	480	2.68124	0.938925	0.750199	0.123986	0.5643	0.7522
送	544	2.7356	0.951947	0.718734	-0.105673	0.554	0.7708
教	624	2.79518	0.904134	0.725369	-0.153017	0.5404	0.745
類	908	2.95809	0.893469	0.759046	-0.205234	0.5538	0.7296
殺	310	2.49136	0.910448	0.661048	-0.06314	0.5098	0.7712
牆	282	2.45025	0.903785	0.705462	0.213021	0.5334	0.7561
忙	389	2.58995	0.895172	0.719185	0.0929081	0.5368	0.7464
睡	297	2.47276	0.854493	0.710091	0.205688	0.52	0.7323
信	389	2.58995	0.896881	0.726686	0.130188	0.5408	0.7442
旁	609	2.78462	0.907982	0.746902	-0.0317539	0.5545	0.7424
某	921	2.96426	0.928118	0.7611	-0.203349	0.5674	0.7455
依	1128	3.05231	0.835647	0.725697	-0.497992	0.5151	0.7098
玩	661	2.8202	0.872571	0.721693	-0.205011	0.5303	0.7348
針	84	1.92428	0.788079	0.540698	0.10315	0.4185	0.774
穿	535	2.72835	0.918293	0.755917	0.0888956	0.5621	0.7436
車	680	2.83251	0.881405	0.726383	-0.198291	0.5344	0.7357
活	526	2.72099	0.898941	0.752415	0.0814201	0.5531	0.7351
哦	375	2.57403	0.697886	0.657315	-0.193131	0.4475	0.6808
均	1310	3.11727	0.847712	0.721752	-0.605168	0.5206	0.7213
懂	398	2.59988	0.90101	0.72687	0.11771	0.5413	0.7447
底	761	2.88138	0.926648	0.74017	-0.195655	0.5572	0.7528
性	384	2.58433	0.876802	0.71317	0.0705847	0.5296	0.7426
套	812	2.90956	0.904134	0.752483	-0.172433	0.5606	0.745
算	564	2.75128	0.940058	0.743376	-0.00433908	0.5611	0.7548
具	1022	3.00945	0.875496	0.769872	-0.220669	0.554	0.7196
望	295	2.46982	0.872571	0.716786	0.242914	0.5325	0.7429
低	742	2.8704	0.896196	0.735541	-0.203861	0.5443	0.74
畫	510	2.70757	0.893129	0.755495	0.114813	0.5534	0.7325
根	379	2.57864	0.927383	0.730337	0.163579	0.5525	0.7565
群	586	2.7679	0.941574	0.758372	0.047792	0.5684	0.7495
般	607	2.78319	0.908685	0.766762	0.068878	0.5615	0.7323
深	628	2.79796	0.957424	0.758356	0.00718965	0.574	0.7569
近	938	2.9722	0.921543	0.783717	-0.101647	0.5747	0.7333
狼	56	1.74819	0.791827	0.510159	0.188745	0.3942	0.7727
杯	203	2.3075	0.85855	0.687585	0.316602	0.5073	0.7378
腳	411	2.61384	0.882729	0.715888	0.044311	0.5299	0.7402
待	511	2.70842	0.948847	0.731701	-0.00458984	0.5588	0.7637
代	644	2.80889	0.922269	0.740766	-0.0949662	0.5535	0.7472
刀	159	2.2014	0.842846	0.662207	0.333496	0.4999	0.7549
需	983	2.99255	0.836839	0.737399	-0.359281	0.5223	0.7083
幫	578	2.76193	0.896538	0.716521	-0.152164	0.5313	0.7415
考	348	2.54158	0.83357	0.668967	-0.0914728	0.4943	0.7389
既	556	2.74507	0.957031	0.776163	0.166979	0.5822	0.7501
層	532	2.72591	0.931072	0.75377	0.0815171	0.5648	0.7493
光	499	2.6981	0.947691	0.745666	0.0787301	0.5635	0.7557
經	1149	3.06032	0.847406	0.750944	-0.383312	0.5367	0.7147
供	725	2.86034	0.852324	0.732205	-0.206871	0.5277	0.7207
僅	873	2.94101	0.893809	0.732259	-0.315354	0.5407	0.7384
頗	644	2.80889	0.910802	0.750034	-0.0489027	0.5548	0.7397
室	384	2.58433	0.801893	0.606387	-0.460127	0.45	0.7421
換	486	2.68664	0.960586	0.747279	0.102198	0.5698	0.7625
毒	116	2.06446	0.896538	0.600224	0.210035	0.4821	0.8032
夢	310	2.49136	0.963371	0.741273	0.335583	0.567	0.7649
管	373	2.57171	0.940058	0.71917	0.11742	0.5511	0.7663
肯	286	2.45637	0.902743	0.725191	0.302827	0.5415	0.7467
法	546	2.73719	0.880085	0.736432	-0.0198609	0.5387	0.7315
皆	876	2.9425	0.893129	0.761728	-0.170899	0.5553	0.729
求	493	2.69285	0.944622	0.75708	0.142539	0.5694	0.7521
似	312	2.49415	0.937042	0.725171	0.251788	0.552	0.7612
舊	409	2.61172	0.912574	0.727734	0.106044	0.545	0.7489
賣	426	2.62941	0.926282	0.749598	0.190867	0.5595	0.7464
批	435	2.63849	0.952336	0.725644	0.0595757	0.5549	0.7647
份	717	2.85552	0.962574	0.771981	-0.00268713	0.583	0.7552
紅	401	2.60314	0.941195	0.726331	0.110635	0.5539	0.7626
股	487	2.68753	0.925549	0.708803	-0.0902318	0.5411	0.7634
相	384	2.58433	0.948462	0.728369	0.146125	0.5556	0.7628
台	796	2.90091	0.881405	0.741949	-0.213139	0.5437	0.7328
抽	158	2.19866	0.914353	0.63383	0.196154	0.498	0.7857
番	482	2.68305	0.93968	0.762778	0.184066	0.5701	0.7474
哭	240	2.38021	0.831208	0.700735	0.283938	0.5053	0.7211
重	550	2.74036	0.963371	0.749279	0.0397165	0.5717	0.763
房	172	2.23553	0.890759	0.604669	0.00152135	0.4766	0.7882
屋	225	2.35218	0.888737	0.665394	0.146074	0.5053	0.7594
剛	707	2.84942	0.932557	0.759909	-0.0544626	0.5675	0.7468
床	245	2.38917	0.854493	0.678854	0.163116	0.5069	0.7467
首	700	2.8451	0.907279	0.716979	-0.262002	0.5363	0.748
樣	566	2.75282	0.942334	0.75185	0.0357053	0.569	0.7568
病	356	2.55145	0.902049	0.687261	-0.0138604	0.5206	0.7575
稱	626	2.79657	0.916139	0.770274	0.0682872	0.568	0.7374
黑	339	2.5302	0.925184	0.720375	0.179363	0.5459	0.7578
苦	319	2.50379	0.914353	0.714456	0.185547	0.5387	0.754
牠	332	2.52114	0.75597	0.705411	0.117205	0.4837	0.6857
故	664	2.82217	0.834162	0.740301	-0.115177	0.5305	0.7166
省	654	2.81558	0.853252	0.733491	-0.140144	0.5287	0.7208
反	469	2.67117	0.906929	0.719642	-0.0143104	0.5393	0.7494
女	593	2.77305	0.914353	0.70456	-0.226605	0.533	0.7565
原	609	2.78462	0.885056	0.743317	-0.0495713	0.545	0.7332
須	697	2.84323	0.864549	0.742324	-0.133522	0.5367	0.723
陣	287	2.45788	0.90518	0.70363	0.193628	0.533	0.7575
按	444	2.64738	0.938548	0.711471	-0.0228548	0.5452	0.7663
提	506	2.70415	0.941954	0.725128	-0.0315019	0.5532	0.7629
直	327	2.51455	0.936667	0.720429	0.20073	0.5512	0.7651
風	374	2.57287	0.926648	0.732079	0.180011	0.5525	0.7547
替	488	2.68842	0.945004	0.749967	0.113154	0.5663	0.7551
姓	129	2.11059	0.889074	0.609163	0.192276	0.476	0.7814
強	596	2.77525	0.960189	0.686214	-0.32074	0.5371	0.7827
神	280	2.44716	0.936291	0.72472	0.312898	0.5497	0.7585
劍	78	1.89209	0.786482	0.519658	0.0419669	0.4071	0.7834
定	463	2.66558	0.953505	0.707877	-0.0652479	0.5491	0.7757
黨	347	2.54033	0.810791	0.732041	0.223689	0.5136	0.7016
船	314	2.49693	0.916139	0.708047	0.162944	0.5367	0.758
搞	370	2.5682	0.909742	0.716906	0.110895	0.5394	0.7524
共	810	2.90849	0.877129	0.696626	-0.4486	0.5162	0.741
陪	249	2.3962	0.889747	0.704239	0.279799	0.5267	0.7479
願	609	2.78462	0.937042	0.755499	0.010975	0.5667	0.7501
嘴	259	2.4133	0.879426	0.699439	0.232893	0.5236	0.7486
校	896	2.95231	0.715795	0.752195	-0.231496	0.4969	0.6606
建	341	2.53275	0.818156	0.728895	0.218262	0.5189	0.7119
麼	70	1.8451	0.655804	0.48334	-0.0751819	0.3612	0.7473
里	201	2.3032	0.925915	0.685885	0.31395	0.5282	0.7701
錯	391	2.59218	0.897909	0.73005	0.143902	0.5425	0.7431
方	501	2.69984	0.924818	0.757551	0.135457	0.5643	0.7449
度	511	2.70842	0.935917	0.717337	-0.0759779	0.5474	0.7631
讀	478	2.67943	0.88706	0.754004	0.14534	0.5508	0.7305
樹	423	2.62634	0.90101	0.672112	-0.190104	0.5102	0.7591
班	643	2.80821	0.876475	0.700659	-0.293385	0.5208	0.7433
差	468	2.67025	0.960586	0.725292	0.0150171	0.5592	0.771
何	524	2.71933	0.940058	0.777479	0.20822	0.5779	0.7433
跑	385	2.58546	0.906228	0.721962	0.11276	0.5401	0.7481
唱	287	2.45788	0.901356	0.723441	0.292088	0.5407	0.7474
甚	387	2.58771	0.924818	0.717569	0.0878939	0.5432	0.757
城	253	2.40312	0.888737	0.657165	0.0365145	0.5003	0.7613
瞧	110	2.04139	0.772885	0.620108	0.33995	0.4595	0.741
樓	343	2.53529	0.959398	0.641947	-0.217291	0.509	0.7929
背	262	2.4183	0.920819	0.703645	0.247057	0.5366	0.7626
愈	389	2.58995	0.941954	0.737127	0.182078	0.5583	0.7574
部	609	2.78462	0.913284	0.747244	-0.0300544	0.5558	0.7438
空	298	2.47422	0.961777	0.710143	0.203977	0.551	0.7759
辦	427	2.63043	0.931443	0.70413	-0.0364844	0.5388	0.7652
菜	255	2.40654	0.843754	0.672176	0.106506	0.4962	0.7382
尚	615	2.78888	0.88706	0.743492	-0.0544415	0.5455	0.7337
茶	250	2.39794	0.856673	0.684018	0.176958	0.5059	0.7396
欸	247	2.3927	0.470955	0.649606	0.012993	0.3376	0.5197
必	449	2.65225	0.920819	0.750739	0.165752	0.559	0.7446
腿	170	2.23045	0.889074	0.631613	0.142282	0.4871	0.7712
據	831	2.9196	0.84649	0.744547	-0.225417	0.5325	0.7152
顆	331	2.51983	0.943476	0.707592	0.129815	0.5452	0.7705
述	557	2.74586	0.855737	0.746339	0.017702	0.5352	0.7171
欲	462	2.66464	0.891097	0.70306	-0.0879201	0.5261	0.7483
選	424	2.62737	0.917215	0.71119	0.00273289	0.5415	0.7614
詩	243	2.38561	0.864867	0.72252	0.384935	0.5265	0.7287
跳	304	2.48287	0.880414	0.716418	0.223493	0.5328	0.7437
東	295	2.46982	0.938925	0.71207	0.219477	0.5463	0.7672
西	330	2.51851	0.937418	0.725889	0.222521	0.5532	0.7621
達	662	2.82086	0.862963	0.754164	-0.0445123	0.5433	0.7204
派	352	2.54654	0.953505	0.719807	0.154512	0.5531	0.7684
忘	309	2.48996	0.92336	0.722649	0.244911	0.5456	0.755
拉	275	2.43933	0.925915	0.694665	0.174076	0.5326	0.7667
堆	309	2.48996	0.927015	0.725958	0.261359	0.5473	0.7539
救	175	2.24304	0.91151	0.658379	0.258337	0.5084	0.7722
支	361	2.55751	0.909389	0.660511	-0.15497	0.5115	0.7744
隨	381	2.58092	0.945387	0.735178	0.184556	0.558	0.759
初	571	2.75664	0.92336	0.750737	0.0250256	0.5602	0.7462
島	259	2.4133	0.843148	0.69346	0.20318	0.509	0.734
佔	464	2.66652	0.899629	0.72648	0.0259459	0.5413	0.7451
痛	209	2.32015	0.916497	0.648153	0.103572	0.5053	0.7796
除	820	2.91381	0.798876	0.728276	-0.298481	0.5079	0.6974
文	549	2.73957	0.899974	0.746726	0.028093	0.5531	0.7407
媽	263	2.41996	0.751536	0.637344	-0.0846902	0.4608	0.723
罵	213	2.32838	0.850473	0.670576	0.203915	0.4975	0.7419
急	258	2.41162	0.919013	0.682647	0.151703	0.524	0.7676
離	325	2.51188	0.946537	0.732668	0.265151	0.558	0.7616
例	512	2.70927	0.905878	0.732488	-0.00182503	0.5427	0.7409
男	371	2.56937	0.917574	0.652906	-0.208764	0.5077	0.7776
憑	219	2.34044	0.965773	0.695853	0.313279	0.5436	0.7812
唉	207	2.31597	0.784627	0.646572	0.101344	0.4687	0.7249
追	182	2.26007	0.909037	0.623188	0.0604797	0.4902	0.7866
屬	484	2.68485	0.880085	0.752886	0.132481	0.5478	0.7276
級	613	2.78746	0.907279	0.722981	-0.154474	0.5452	0.7541
搭	255	2.40654	0.90763	0.70466	0.267953	0.5323	0.7554
盡	335	2.52504	0.969805	0.735768	0.262817	0.5661	0.7694
躺	170	2.23045	0.873219	0.689322	0.429095	0.5132	0.7445
收	333	2.52244	0.961777	0.663345	-0.0936215	0.5259	0.7928
抱	264	2.4216	0.940058	0.716804	0.308003	0.549	0.7659
輕	286	2.45637	0.953505	0.71301	0.242286	0.5508	0.7725
報	390	2.59106	0.94424	0.708355	0.0375778	0.5443	0.7684
飛	274	2.43775	0.912219	0.710485	0.25483	0.5367	0.7554
入	336	2.52634	0.942334	0.711352	0.139725	0.5439	0.7646
關	259	2.4133	0.934794	0.696438	0.217978	0.5357	0.7692
驚	101	2.00432	0.774432	0.607983	0.329661	0.4524	0.7441
掛	241	2.38202	0.947306	0.710004	0.327571	0.5472	0.7707
火	203	2.3075	0.948847	0.687195	0.314663	0.5345	0.7778
留	339	2.5302	0.947306	0.728614	0.220313	0.5579	0.7657
發	350	2.54407	0.965773	0.676186	-0.058953	0.5304	0.7844
照	321	2.50651	0.968592	0.71767	0.19786	0.5544	0.7725
響	133	2.12385	0.815025	0.648018	0.36751	0.4807	0.7418
短	344	2.53656	0.914353	0.7205	0.171414	0.5416	0.7517
任	434	2.63749	0.907982	0.74351	0.149717	0.5499	0.7396
鬼	100	2	0.896881	0.590932	0.250744	0.464	0.7852
碗	141	2.14922	0.835647	0.643185	0.309292	0.4766	0.741
吹	168	2.22531	0.925184	0.654381	0.262369	0.5078	0.776
飯	231	2.36361	0.815877	0.697491	0.29019	0.5031	0.7213
街	277	2.44248	0.919734	0.706022	0.226274	0.537	0.7606
念	311	2.49276	0.884057	0.683684	0.047479	0.5129	0.7502
轉	242	2.38382	0.975104	0.658046	0.0669146	0.5267	0.8004
晚	221	2.34439	0.92775	0.665856	0.158874	0.5203	0.7814
窗	181	2.25768	0.876802	0.665261	0.272809	0.505	0.7591
洞	146	2.16435	0.883724	0.652556	0.335465	0.4979	0.763
詞	278	2.44404	0.811353	0.666849	0.0294746	0.4884	0.7324
拍	249	2.3962	0.882066	0.69714	0.244518	0.5216	0.7482
絲	124	2.09342	0.92775	0.651008	0.423387	0.5072	0.7791
筆	435	2.63849	0.950394	0.72126	0.0377882	0.554	0.7681
右	229	2.35984	0.962574	0.656889	0.0934873	0.524	0.7977
團	239	2.3784	0.93968	0.678319	0.174975	0.5278	0.7781
線	418	2.62118	0.873544	0.657192	-0.257297	0.5017	0.7634
瓶	110	2.04139	0.852942	0.562382	0.0530525	0.4476	0.7959
河	213	2.32838	0.885056	0.661341	0.158019	0.505	0.7636
哈	135	2.13033	0.699187	0.62293	0.234083	0.4439	0.7126
幹	189	2.27646	0.886391	0.668649	0.264326	0.5059	0.7566
幅	254	2.40483	0.891773	0.704687	0.27039	0.5307	0.7531
期	484	2.68485	0.878112	0.706532	-0.0978999	0.5246	0.7425
牛	156	2.19312	0.927383	0.658399	0.32572	0.5123	0.7781
煙	123	2.08991	0.906929	0.634908	0.348114	0.4958	0.7809
壞	316	2.49969	0.934794	0.700892	0.123663	0.5345	0.7626
遍	174	2.24055	0.932557	0.685005	0.394023	0.5267	0.7689
左	217	2.33646	0.965773	0.684838	0.263906	0.5402	0.7888
鳥	228	2.35793	0.860751	0.68552	0.23835	0.5151	0.7514
搖	76	1.88081	0.871601	0.565877	0.286882	0.4441	0.7848
朝	335	2.52504	0.948462	0.70703	0.119989	0.5471	0.7738
裝	216	2.33445	0.944622	0.681701	0.251022	0.5305	0.7782
招	100	2	0.930332	0.588352	0.237921	0.4738	0.8053
橋	158	2.19866	0.813326	0.634137	0.197679	0.4737	0.747
樂	214	2.33041	0.936291	0.680072	0.248371	0.5276	0.7758
傷	166	2.22011	0.948462	0.638986	0.192867	0.5094	0.7972
接	333	2.52244	0.955068	0.7008	0.092528	0.5434	0.7754
腰	125	2.09691	0.862963	0.618467	0.256955	0.4816	0.7787
意	236	2.37291	0.950007	0.704755	0.313755	0.544	0.7719
物	207	2.31597	0.927383	0.680548	0.270208	0.5262	0.7732
區	328	2.51587	0.882397	0.695242	0.0737631	0.5231	0.7524
皮	88	1.94448	0.944622	0.570225	0.222665	0.4669	0.8188
完	246	2.39094	0.929224	0.685896	0.195731	0.5291	0.7714
舉	340	2.53148	0.947691	0.700491	0.0788165	0.5419	0.7736
縣	263	2.41996	0.841035	0.692371	0.188791	0.5082	0.734
取	311	2.49276	0.955068	0.71575	0.206845	0.5517	0.7708
停	256	2.40824	0.917574	0.654431	0.0160221	0.5081	0.7764
躲	159	2.2014	0.85855	0.641815	0.232147	0.4838	0.7538
視	390	2.59106	0.890759	0.740861	0.199134	0.5472	0.7386
組	499	2.6981	0.879097	0.631703	-0.487672	0.4842	0.7665
北	347	2.54033	0.904482	0.685254	-0.00884481	0.5186	0.7568
藉	471	2.67302	0.858864	0.761321	0.190341	0.5464	0.7177
篇	429	2.63246	0.912219	0.712115	0.000468058	0.5343	0.7503
理	173	2.23805	0.940058	0.654013	0.243367	0.5134	0.785
哇	254	2.40483	0.794525	0.669539	0.0957004	0.4818	0.7196
乘	136	2.13354	0.943095	0.649549	0.362058	0.511	0.7867
倍	390	2.59106	0.899285	0.722565	0.108202	0.5386	0.7454
吵	134	2.1271	0.854493	0.658589	0.415662	0.4892	0.7428
桌	223	2.3483	0.917933	0.662873	0.138775	0.5126	0.7733
市	426	2.62941	0.83357	0.703034	-0.0405547	0.5097	0.725
雪	108	2.03342	0.853562	0.610029	0.300598	0.4696	0.7698
色	161	2.20683	0.936667	0.663799	0.334089	0.5169	0.7787
魚	272	2.43457	0.924088	0.706878	0.241197	0.5385	0.7618
乃	420	2.62325	0.871601	0.710523	0.00496621	0.5233	0.7365
騙	115	2.0607	0.858864	0.610661	0.266976	0.4674	0.7654
流	175	2.24304	0.93968	0.671767	0.324875	0.5225	0.7778
刻	154	2.18752	0.953505	0.654432	0.313561	0.5153	0.7874
治	147	2.16732	0.933674	0.617801	0.158738	0.4956	0.8022
騎	206	2.31387	0.92775	0.657417	0.158079	0.5141	0.782
害	197	2.29447	0.910448	0.649922	0.146982	0.5007	0.7704
雙	222	2.34635	0.971836	0.691233	0.282352	0.544	0.787
熱	302	2.48001	0.929224	0.710516	0.198024	0.5412	0.7617
南	275	2.43933	0.903438	0.702351	0.212273	0.5288	0.7529
圖	371	2.56937	0.942714	0.727912	0.164018	0.5586	0.7674
咬	113	2.05308	0.84436	0.645675	0.451264	0.4829	0.7479
耶	171	2.233	0.578725	0.620765	0.0849349	0.3958	0.6376
端	218	2.33846	0.928855	0.661229	0.143879	0.5229	0.7908
累	192	2.2833	0.870632	0.667157	0.247688	0.4993	0.7484
答	323	2.5092	0.848018	0.685352	0.033605	0.5086	0.7421
吸	104	2.01703	0.889074	0.600255	0.27412	0.47	0.783
抓	235	2.37107	0.914709	0.707073	0.327765	0.5378	0.7606
貨	145	2.16137	0.848937	0.621124	0.183271	0.4787	0.7707
交	223	2.3483	0.947691	0.67371	0.192633	0.5261	0.7809
村	172	2.23553	0.906929	0.652129	0.237399	0.5054	0.775
情	263	2.41996	0.945004	0.71287	0.290673	0.5467	0.7669
掉	155	2.19033	0.912219	0.672253	0.398339	0.5175	0.7698
插	136	2.13354	0.928118	0.633312	0.281362	0.5	0.7895
摸	115	2.0607	0.898941	0.623235	0.329466	0.4898	0.7859
包	182	2.26007	0.904482	0.675128	0.318618	0.516	0.7643
搶	182	2.26007	0.960189	0.671666	0.301416	0.5284	0.7867
亂	267	2.42651	0.935542	0.702558	0.230586	0.5383	0.7662
實	361	2.55751	0.888401	0.728591	0.183386	0.5377	0.738
肉	178	2.25042	0.899285	0.661081	0.261816	0.5089	0.7698
歌	261	2.41664	0.884722	0.698766	0.225046	0.521	0.7456
刺	80	1.90309	0.832978	0.538048	0.118546	0.4207	0.7819
蓋	265	2.42325	0.926282	0.710322	0.273575	0.5402	0.7605
狗	205	2.31175	0.886391	0.670716	0.227022	0.508	0.7574
爬	164	2.21484	0.86774	0.667511	0.341729	0.5009	0.7504
諸	216	2.33445	0.919734	0.648038	0.0837156	0.5021	0.7748
稍	266	2.42488	0.951947	0.715753	0.29836	0.5507	0.7694
試	272	2.43457	0.938548	0.69987	0.206365	0.5389	0.77
副	179	2.25285	0.948462	0.67784	0.341831	0.5298	0.7816
斤	103	2.01284	0.851706	0.616647	0.361243	0.4734	0.7677
怪	178	2.25042	0.916139	0.674873	0.330363	0.5181	0.7677
鬧	119	2.07555	0.922269	0.661374	0.499001	0.5123	0.7746
戴	202	2.30535	0.945387	0.690252	0.332748	0.5346	0.7745
修	223	2.3483	0.948462	0.649167	0.0706548	0.5144	0.7924
貴	242	2.38382	0.933301	0.680791	0.179956	0.527	0.7741
院	569	2.75511	0.708187	0.68108	-0.319116	0.4615	0.6776
波	272	2.43457	0.832683	0.674929	0.0824087	0.501	0.7423
爭	217	2.33646	0.963371	0.655854	0.119856	0.5176	0.7892
改	272	2.43457	0.975514	0.680167	0.108441	0.5374	0.7901
草	138	2.13988	0.924453	0.634842	0.280416	0.4967	0.7824
胸	102	2.0086	0.891097	0.615772	0.362604	0.4771	0.7748
頓	153	2.18469	0.876802	0.652328	0.306918	0.4959	0.7602
匹	56	1.74819	0.891435	0.503028	0.153304	0.4153	0.8256
弄	168	2.22531	0.949234	0.610054	0.0420628	0.4939	0.8096
沙	74	1.86923	0.921906	0.534887	0.148473	0.4385	0.8198
硬	184	2.26482	0.966576	0.654054	0.207484	0.5203	0.7955
通	239	2.3784	0.950782	0.709925	0.332055	0.5465	0.7698
惡	113	2.05308	0.937042	0.625315	0.350078	0.496	0.7932
頂	201	2.3032	0.912929	0.691944	0.344066	0.5274	0.7622
遭	437	2.64048	0.847712	0.70015	-0.0698139	0.5123	0.7317
勸	141	2.14922	0.880085	0.660482	0.395261	0.4984	0.7546
蠻	221	2.34439	0.811916	0.64737	0.0669967	0.4775	0.7376
側	157	2.1959	0.879755	0.666314	0.361321	0.5044	0.757
唸	160	2.20412	0.885723	0.649434	0.266341	0.4987	0.7679
世	195	2.29003	0.925184	0.690971	0.356969	0.5288	0.7653
聞	151	2.17898	0.922269	0.665718	0.381168	0.5146	0.773
灰	71	1.85126	0.891097	0.530802	0.152402	0.4334	0.8165
拜	108	2.03342	0.951947	0.646412	0.481426	0.5117	0.7916
表	255	2.40654	0.896196	0.65316	0.011996	0.5013	0.7675
係	500	2.69897	0.785686	0.66775	-0.309689	0.4727	0.7079
冷	208	2.31806	0.921181	0.682965	0.279396	0.5252	0.769
隔	187	2.27184	0.945004	0.679538	0.324673	0.5297	0.7795
產	175	2.24304	0.889747	0.645258	0.193125	0.4973	0.7707
逃	92	1.96379	0.860436	0.612583	0.407164	0.4693	0.7661
洗	190	2.27875	0.895854	0.666361	0.249867	0.5095	0.7646
禮	117	2.06819	0.929962	0.632261	0.364236	0.4974	0.7867
嚇	135	2.13033	0.795609	0.634586	0.292015	0.4609	0.7263
趕	164	2.21484	0.967784	0.645695	0.233305	0.5152	0.7979
覺	141	2.14922	0.911155	0.65499	0.367962	0.5067	0.7736
挺	127	2.1038	0.87517	0.618179	0.246235	0.4815	0.7789
枚	85	1.92942	0.91364	0.549614	0.140534	0.4481	0.8153
型	309	2.48996	0.834756	0.684772	0.0566633	0.5068	0.7401
金	162	2.20952	0.950394	0.653224	0.277906	0.5167	0.791
帝	138	2.13988	0.924818	0.662014	0.415462	0.5122	0.7737
拳	38	1.57978	0.83654	0.43985	0.0663183	0.3638	0.8271
貼	172	2.23553	0.959002	0.670909	0.330734	0.5272	0.7858
古	204	2.30963	0.90763	0.693451	0.34288	0.5273	0.7604
命	169	2.22789	0.916856	0.665672	0.315011	0.5133	0.7711
練	114	2.0569	0.90763	0.631261	0.374472	0.4915	0.7786
機	134	2.1271	0.818156	0.615849	0.203242	0.4694	0.7622
二	259	2.4133	0.925184	0.61885	-0.167636	0.4918	0.7947
店	233	2.36736	0.909742	0.673448	0.165651	0.5164	0.7668
推	137	2.13672	0.937794	0.649854	0.359287	0.5128	0.7891
棵	172	2.23553	0.863597	0.681849	0.385107	0.506	0.7421
蛇	99	1.99564	0.88941	0.563769	0.121628	0.4469	0.7927
伸	57	1.75587	0.845272	0.507496	0.165149	0.4062	0.8004
斜	64	1.80618	0.891435	0.553682	0.326879	0.4399	0.7945
餓	114	2.0569	0.773142	0.642897	0.432302	0.4598	0.7152
館	166	2.22011	0.804654	0.638301	0.189459	0.4673	0.7321
採	428	2.63144	0.891097	0.732165	0.10148	0.5429	0.7415
案	430	2.63347	0.776764	0.708924	-0.016754	0.4949	0.6981
沿	228	2.35793	0.865823	0.693072	0.275882	0.5162	0.7448
清	162	2.20952	0.966979	0.678349	0.40278	0.5342	0.7875
血	170	2.23045	0.910448	0.655296	0.259985	0.5129	0.7827
猛	117	2.06819	0.908685	0.621925	0.312864	0.493	0.7927
忽	60	1.77815	0.775467	0.504654	0.120992	0.3904	0.7736
耳	116	2.06446	0.913996	0.648771	0.451314	0.5015	0.773
排	244	2.38739	0.967784	0.675929	0.150977	0.5327	0.7881
音	132	2.12057	0.857298	0.642273	0.343375	0.4871	0.7584
圍	112	2.04922	0.898253	0.642216	0.43928	0.4938	0.7689
踏	122	2.08636	0.909742	0.661244	0.483782	0.5081	0.7684
寬	204	2.30963	0.897909	0.644516	0.0996712	0.5024	0.7795
假	272	2.43457	0.965773	0.635487	-0.11362	0.5075	0.7986
藏	122	2.08636	0.947691	0.642559	0.390917	0.5082	0.7909
吻	43	1.63347	0.841939	0.474943	0.168365	0.3772	0.7942
奇	88	1.94448	0.921906	0.587135	0.306712	0.471	0.8022
記	215	2.33244	0.958607	0.660112	0.146437	0.5203	0.7882
力	236	2.37291	0.941954	0.691171	0.246243	0.5378	0.7781
立	184	2.26482	0.941574	0.683938	0.35601	0.5293	0.7739
微	90	1.95424	0.95546	0.57204	0.218532	0.4677	0.8176
缺	182	2.26007	0.94577	0.652279	0.205059	0.5138	0.7877
香	149	2.17319	0.890759	0.648673	0.304261	0.5011	0.7725
柄	36	1.5563	0.737312	0.379866	-0.20015	0.3064	0.8066
爸	169	2.22789	0.737312	0.620603	0.0910155	0.4446	0.7164
借	180	2.25527	0.95546	0.648045	0.190488	0.5139	0.793
藥	181	2.25768	0.884389	0.656867	0.231086	0.5027	0.7653
擺	222	2.34635	0.941195	0.697949	0.315734	0.5377	0.7704
亮	143	2.15534	0.879097	0.648684	0.328378	0.4954	0.7637
握	78	1.89209	0.862329	0.588892	0.38606	0.4538	0.7706
明	113	2.05308	0.94962	0.624687	0.346954	0.4985	0.798
翻	131	2.11727	0.931072	0.646303	0.367854	0.5078	0.7857
拖	122	2.08636	0.912574	0.643978	0.397971	0.5005	0.7772
架	166	2.22011	0.968592	0.646897	0.232182	0.517	0.7992
慢	218	2.33846	0.953505	0.694077	0.307133	0.5402	0.7783
哼	85	1.92942	0.76523	0.556155	0.173046	0.4224	0.7595
票	184	2.26482	0.933301	0.641957	0.14736	0.5092	0.7932
合	217	2.33646	0.980053	0.632325	0.0029191	0.5082	0.8037
三	270	2.43136	0.920819	0.613949	-0.216345	0.4868	0.7929
羊	93	1.96848	0.921543	0.606417	0.370187	0.4801	0.7917
廠	216	2.33445	0.770062	0.665831	0.172144	0.4778	0.7176
江	89	1.94939	0.886391	0.60601	0.393903	0.4699	0.7754
喊	178	2.25042	0.911864	0.65865	0.249735	0.5094	0.7734
隊	268	2.42813	0.820448	0.603588	-0.263484	0.4609	0.7636
丟	127	2.1038	0.907279	0.65062	0.407463	0.5041	0.7748
燒	147	2.16732	0.922996	0.646288	0.300319	0.5032	0.7786
感	191	2.28103	0.924088	0.701996	0.4239	0.5345	0.7614
子	230	2.36173	0.942334	0.703694	0.323561	0.541	0.7688
註	200	2.30103	0.855426	0.663596	0.206095	0.4971	0.7491
擠	141	2.14922	0.931443	0.659155	0.388666	0.5119	0.7766
易	308	2.48855	0.86742	0.731644	0.291513	0.5341	0.73
封	181	2.25768	0.886057	0.671035	0.301505	0.5069	0.7554
醒	71	1.85126	0.81673	0.577618	0.385079	0.4346	0.7524
境	174	2.24055	0.840433	0.630601	0.123636	0.4785	0.7588
逼	149	2.17319	0.947306	0.645161	0.286807	0.51	0.7905
式	222	2.34635	0.850165	0.683769	0.245257	0.5051	0.7387
恨	116	2.06446	0.921906	0.650475	0.459785	0.5062	0.7782
付	151	2.17898	0.935168	0.665425	0.379713	0.5181	0.7786
升	267	2.42651	0.936291	0.676006	0.0986201	0.526	0.7781
節	158	2.19866	0.925184	0.592081	-0.0113392	0.4755	0.8031
歸	163	2.21219	0.946154	0.671628	0.365775	0.5234	0.7793
盤	166	2.22011	0.918653	0.599124	-0.00524772	0.479	0.7995
號	315	2.49831	0.910802	0.663662	-0.0595135	0.5154	0.7766
守	136	2.13354	0.948076	0.644208	0.335512	0.5077	0.7881
設	378	2.57749	0.87517	0.711949	0.0737371	0.5267	0.7398
刷	31	1.49136	0.893809	0.420989	0.0917733	0.3498	0.8309
章	128	2.10721	0.909389	0.615844	0.230034	0.4851	0.7877
暗	109	2.03743	0.914353	0.645335	0.470674	0.5042	0.7813
噸	99	1.99564	0.864549	0.587398	0.239063	0.454	0.7729
遇	148	2.17026	0.94424	0.635533	0.242897	0.5008	0.788
存	171	2.233	0.939302	0.660863	0.28422	0.5162	0.7811
米	162	2.20952	0.935168	0.655278	0.288118	0.5121	0.7815
傳	147	2.16732	0.958213	0.657891	0.357987	0.5198	0.7901
圓	154	2.18752	0.943858	0.652285	0.302887	0.5125	0.7857
肩	92	1.96379	0.924818	0.582677	0.258531	0.4662	0.8001
五	246	2.39094	0.897909	0.649723	0.0159534	0.5049	0.7771
賺	197	2.29447	0.84863	0.654114	0.167817	0.4881	0.7462
混	105	2.02119	0.933301	0.612736	0.330548	0.4859	0.793
窮	113	2.05308	0.873869	0.606277	0.255458	0.4752	0.7838
綠	171	2.233	0.937794	0.660028	0.280071	0.517	0.7833
單	220	2.34242	0.944622	0.68831	0.273125	0.5364	0.7793
終	176	2.24551	0.91151	0.681466	0.369745	0.5188	0.7613
親	123	2.08991	0.950394	0.631579	0.331566	0.5028	0.7961
餘	96	1.98227	0.909389	0.626361	0.450724	0.489	0.7807
糧	72	1.85733	0.778325	0.523547	0.108156	0.3991	0.7623
佳	282	2.45025	0.885723	0.654614	-0.0396942	0.5015	0.7661
戶	186	2.26951	0.898941	0.668684	0.273867	0.5082	0.76
細	127	2.1038	0.93968	0.65063	0.407515	0.5112	0.7857
燈	123	2.08991	0.943095	0.632529	0.33629	0.5009	0.7919
瞪	71	1.85126	0.800245	0.579489	0.394377	0.4334	0.7479
赴	362	2.55871	0.848937	0.632284	-0.29688	0.472	0.7465
撲	52	1.716	0.757956	0.520842	0.285222	0.3961	0.7605
呈	195	2.29003	0.881735	0.665434	0.23005	0.5038	0.7571
破	185	2.26717	0.976336	0.64139	0.141369	0.5151	0.8031
落	120	2.07918	0.922996	0.631263	0.344451	0.4939	0.7824
局	257	2.40993	0.82594	0.581101	-0.350712	0.4403	0.7577
呆	47	1.6721	0.815025	0.518857	0.334544	0.4031	0.7769
專	176	2.24551	0.950782	0.661827	0.272137	0.5196	0.7851
負	144	2.15836	0.94962	0.632466	0.243693	0.503	0.7953
領	154	2.18752	0.941954	0.651687	0.299916	0.5119	0.7855
含	239	2.3784	0.942334	0.627541	-0.0773934	0.5063	0.8068
永	104	2.01703	0.937042	0.644824	0.495627	0.5058	0.7844
載	151	2.17898	0.957031	0.641626	0.26143	0.5099	0.7947
圈	133	2.12385	0.933674	0.640565	0.330469	0.5031	0.7854
訂	223	2.3483	0.943095	0.631235	-0.0184676	0.5024	0.7959
量	274	2.43775	0.898253	0.659129	-0.000407415	0.5101	0.7739
趟	158	2.19866	0.919734	0.656161	0.307142	0.508	0.7742
雞	143	2.15534	0.917933	0.666796	0.418397	0.5137	0.7704
權	168	2.22531	0.897566	0.657806	0.279387	0.5048	0.7674
廣	227	2.35603	0.891773	0.71467	0.385795	0.532	0.7444
利	135	2.13033	0.960189	0.645999	0.348735	0.5126	0.7935
養	211	2.32428	0.928855	0.694112	0.326412	0.5328	0.7676
乾	115	2.0607	0.893469	0.602347	0.225653	0.4723	0.7841
偷	90	1.95424	0.902396	0.586403	0.289913	0.4649	0.7928
雨	223	2.3483	0.882729	0.678713	0.2175	0.5127	0.7554
尋	110	2.04139	0.943095	0.632511	0.401594	0.5	0.7905
鬥	56	1.74819	0.905878	0.541662	0.345313	0.4401	0.8125
鋪	69	1.83885	0.902743	0.569485	0.361382	0.452	0.7937
族	110	2.04139	0.896196	0.594341	0.211887	0.4684	0.7881
黃	147	2.16732	0.909037	0.651681	0.327122	0.5059	0.7763
勝	165	2.21748	0.768021	0.620451	0.104282	0.4569	0.7364
足	102	2.0086	0.957424	0.621193	0.389549	0.4977	0.8012
嫌	205	2.31175	0.968592	0.653373	0.140832	0.521	0.7974
略	188	2.27416	0.94577	0.681234	0.329978	0.53	0.778
挑	111	2.04532	0.921906	0.636178	0.414523	0.4994	0.785
旅	149	2.17319	0.902743	0.652051	0.321047	0.5056	0.7754
披	56	1.74819	0.883724	0.540159	0.337844	0.4284	0.7931
衣	66	1.81954	0.958213	0.545951	0.270444	0.4497	0.8237
屆	459	2.66181	0.815877	0.664339	-0.276549	0.4853	0.7305
喜	131	2.11727	0.943858	0.649257	0.382535	0.5109	0.7869
湖	112	2.04922	0.88773	0.61441	0.301083	0.4801	0.7814
畝	58	1.76343	0.770062	0.535266	0.292985	0.3969	0.7415
哎	82	1.91381	0.594312	0.46552	-0.256379	0.3382	0.7265
爹	28	1.44716	0.735182	0.398128	0.037739	0.3105	0.7799
週	367	2.56467	0.864549	0.675285	-0.091197	0.5041	0.7465
嘆	66	1.81954	0.828566	0.547014	0.275726	0.4241	0.7753
曰	108	2.03342	0.874844	0.638933	0.444252	0.4861	0.7608
論	174	2.24055	0.932185	0.687638	0.407113	0.5279	0.7677
甜	81	1.90849	0.90309	0.584018	0.339744	0.4619	0.7909
角	97	1.98677	0.962574	0.620453	0.415297	0.4981	0.8028
列	162	2.20952	0.935542	0.671615	0.36931	0.5203	0.7747
兼	212	2.32634	0.955852	0.667389	0.19083	0.5239	0.785
尺	72	1.85733	0.896538	0.579175	0.384626	0.4561	0.7875
娶	90	1.95424	0.876475	0.593794	0.326649	0.4631	0.7799
退	117	2.06819	0.952336	0.633379	0.369792	0.5055	0.7981
漲	185	2.26717	0.795609	0.627778	0.0737177	0.4633	0.738
善	129	2.11059	0.893129	0.6599	0.444442	0.5039	0.7636
致	249	2.3962	0.855426	0.695062	0.234193	0.5124	0.7372
主	91	1.95904	0.958607	0.610924	0.405317	0.4899	0.8019
挖	105	2.02119	0.946154	0.620003	0.366661	0.4947	0.7979
頁	178	2.25042	0.898597	0.629686	0.105785	0.4938	0.7842
遂	223	2.3483	0.868702	0.674807	0.198083	0.5057	0.7494
布	78	1.89209	0.890759	0.575505	0.319528	0.4558	0.792
朵	91	1.95904	0.937418	0.608076	0.391162	0.4864	0.7999
脫	76	1.88081	0.96417	0.583866	0.37629	0.4748	0.8132
登	142	2.15229	0.947306	0.625126	0.215403	0.4956	0.7928
確	177	2.24797	0.901356	0.665621	0.287676	0.509	0.7647
懷	98	1.99123	0.932929	0.642437	0.518549	0.502	0.7814
夾	89	1.94939	0.915781	0.613244	0.429854	0.4825	0.7868
紙	179	2.25285	0.966979	0.670552	0.30561	0.5292	0.7892
岸	110	2.04139	0.877456	0.640918	0.443377	0.4887	0.7625
聯	296	2.47129	0.819301	0.710523	0.209806	0.5098	0.7175
吐	94	1.97313	0.920096	0.624651	0.454549	0.4916	0.787
睜	43	1.63347	0.874844	0.475105	0.16917	0.3836	0.8074
遊	114	2.0569	0.899629	0.650091	0.468056	0.5007	0.7702
順	125	2.09691	0.951558	0.654041	0.433761	0.5163	0.7894
摟	20	1.30103	0.762205	0.391271	0.20064	0.3039	0.7767
毛	102	2.0086	0.871278	0.605417	0.311139	0.4672	0.7717
閃	68	1.83251	0.883392	0.539163	0.21923	0.4316	0.8005
埋	84	1.92428	0.880085	0.598091	0.388396	0.4637	0.7753
田	115	2.0607	0.877456	0.624789	0.337191	0.4809	0.7697
姐	49	1.6902	0.811072	0.462307	0.0290933	0.3655	0.7906
園	93	1.96848	0.839231	0.544133	0.0606354	0.4229	0.7772
塞	56	1.74819	0.884389	0.537577	0.325014	0.4256	0.7917
緊	109	2.03743	0.943476	0.631029	0.399574	0.5011	0.7941
槍	117	2.06819	0.873219	0.597999	0.193954	0.4723	0.7898
引	116	2.06446	0.962175	0.662234	0.518226	0.5229	0.7896
壓	116	2.06446	0.941954	0.632971	0.372786	0.5003	0.7904
末	172	2.23553	0.905529	0.658669	0.269905	0.5079	0.7711
摔	71	1.85126	0.862013	0.560159	0.298303	0.4381	0.7821
認	80	1.90309	0.956638	0.56586	0.256771	0.4631	0.8184
輛	221	2.34439	0.891773	0.659135	0.125472	0.5047	0.7657
語	140	2.14613	0.932557	0.642793	0.311512	0.5026	0.7819
抬	76	1.88081	0.850165	0.580662	0.360365	0.4474	0.7705
球	171	2.233	0.8173	0.599159	-0.022447	0.4562	0.7614
業	167	2.22272	0.839231	0.604433	0.0176207	0.4772	0.7895
富	176	2.24551	0.955068	0.646437	0.195649	0.5134	0.7942
株	62	1.79239	0.859178	0.512524	0.14091	0.4072	0.7945
碰	144	2.15836	0.916856	0.640934	0.285778	0.4998	0.7798
挨	59	1.77085	0.873219	0.542014	0.316511	0.4296	0.7926
震	31	1.49136	0.782779	0.397452	-0.0252079	0.3182	0.8006
衝	107	2.02938	0.904134	0.620893	0.360041	0.4838	0.7792
食	133	2.12385	0.891773	0.661229	0.433166	0.5026	0.7601
眾	124	2.09342	0.947691	0.654962	0.443039	0.5148	0.786
薄	94	1.97313	0.960983	0.602053	0.342241	0.4867	0.8084
凡	203	2.3075	0.860436	0.645968	0.109768	0.4879	0.7553
捉	82	1.91381	0.891435	0.598103	0.402564	0.4667	0.7803
造	158	2.19866	0.948076	0.644447	0.248924	0.5095	0.7906
賞	115	2.0607	0.935917	0.640827	0.416902	0.5051	0.7882
捧	74	1.86923	0.928855	0.588118	0.413032	0.4702	0.7995
猜	88	1.94448	0.849858	0.582398	0.283165	0.4513	0.7749
雲	110	2.04139	0.93442	0.623411	0.356366	0.4953	0.7945
濕	54	1.73239	0.886725	0.531187	0.314545	0.4224	0.7952
漸	175	2.24304	0.910802	0.670605	0.319102	0.5165	0.7702
純	162	2.20952	0.928855	0.674166	0.38199	0.5214	0.7734
畔	79	1.89763	0.878769	0.579921	0.334017	0.4546	0.7839
民	101	2.00432	0.897223	0.624727	0.412878	0.4856	0.7773
謂	150	2.17609	0.875496	0.6603	0.35813	0.4978	0.7539
奔	46	1.66276	0.852324	0.525789	0.381586	0.4149	0.7891
唇	32	1.50515	0.882066	0.419245	0.0645166	0.3442	0.821
丈	44	1.64345	0.799697	0.490339	0.231423	0.3832	0.7815
失	105	2.02119	0.943858	0.606952	0.3018	0.4889	0.8055
豬	116	2.06446	0.907982	0.626689	0.341565	0.4917	0.7846
縱	49	1.6902	0.852015	0.509155	0.261927	0.406	0.7974
棟	167	2.22272	0.881735	0.666093	0.32407	0.5029	0.755
占	197	2.29447	0.922996	0.663535	0.214636	0.5155	0.7769
秒	128	2.10721	0.874194	0.578483	0.0443504	0.4522	0.7817
體	157	2.1959	0.865823	0.633237	0.196928	0.4843	0.7648
獲	381	2.58092	0.843451	0.678042	-0.0994094	0.4987	0.7355
始	158	2.19866	0.861382	0.655951	0.306098	0.4938	0.7528
臺	204	2.30963	0.856985	0.680757	0.27979	0.5073	0.7452
戰	192	2.2833	0.77083	0.630567	0.0658391	0.4757	0.7544
拔	42	1.62325	0.876802	0.481746	0.215947	0.3919	0.8135
土	126	2.10037	0.945387	0.652965	0.423749	0.5131	0.7858
臨	102	2.0086	0.934047	0.619882	0.38303	0.492	0.7937
棒	106	2.02531	0.902396	0.536389	-0.0544467	0.4341	0.8093
青	74	1.86923	0.937418	0.568055	0.313323	0.4595	0.8089
厚	90	1.95424	0.934047	0.604754	0.381118	0.4809	0.7952
葉	118	2.07188	0.899629	0.644297	0.419071	0.4954	0.7689
官	120	2.07918	0.90763	0.642572	0.40066	0.4996	0.7775
居	164	2.21484	0.934794	0.659181	0.300332	0.5137	0.7793
餐	100	2	0.846185	0.627978	0.434861	0.4745	0.7556
煮	112	2.04922	0.855737	0.602504	0.241909	0.462	0.7668
宮	61	1.78533	0.883392	0.501689	0.0965808	0.401	0.7993
糖	65	1.81291	0.883392	0.508824	0.0948605	0.4094	0.8046
兒	64	1.80618	0.917215	0.540112	0.259436	0.4356	0.8065
平	100	2	0.988853	0.59667	0.279263	0.491	0.8229
鐵	85	1.92942	0.935168	0.599448	0.388211	0.4777	0.7969
觀	157	2.1959	0.909389	0.672618	0.392651	0.5161	0.7673
費	112	2.04922	0.950007	0.631711	0.387071	0.5024	0.7953
輸	134	2.1271	0.957031	0.647244	0.359278	0.5132	0.7929
邀	201	2.3032	0.871278	0.643275	0.102177	0.495	0.7695
汗	54	1.73239	0.849551	0.524298	0.280306	0.4089	0.7799
犯	144	2.15836	0.950007	0.621693	0.190151	0.4958	0.7975
閉	77	1.88649	0.854182	0.579778	0.34832	0.4444	0.7665
止	202	2.30535	0.869023	0.609646	-0.0678626	0.474	0.7775
扇	48	1.68124	0.922996	0.528804	0.371653	0.4296	0.8124
科	249	2.3962	0.886725	0.647165	-0.00385687	0.5011	0.7743
酸	58	1.76343	0.918653	0.51942	0.214227	0.4226	0.8136
四	190	2.27875	0.913284	0.605449	-0.052869	0.48	0.7928
散	81	1.90849	0.948076	0.595776	0.398183	0.4796	0.805
鄉	156	2.19312	0.906578	0.643952	0.25392	0.4999	0.7763
濃	81	1.90849	0.918293	0.588791	0.363465	0.4675	0.794
沾	63	1.79934	0.927383	0.564077	0.387764	0.4516	0.8006
腦	112	2.04922	0.956245	0.634082	0.398853	0.5053	0.7969
德	121	2.08279	0.960189	0.618905	0.278176	0.4976	0.804
弱	116	2.06446	0.936291	0.623172	0.324086	0.4943	0.7932
疼	75	1.87506	0.822752	0.544637	0.189075	0.4179	0.7673
幢	105	2.02119	0.820161	0.591912	0.227052	0.4479	0.7567
演	187	2.27184	0.919374	0.672001	0.287213	0.5165	0.7686
壯	67	1.82607	0.958213	0.560073	0.331827	0.4587	0.819
數	151	2.17898	0.975104	0.655423	0.330003	0.5227	0.7975
特	192	2.2833	0.901702	0.603293	-0.0697137	0.4763	0.7895
化	109	2.03743	0.980884	0.626111	0.37513	0.5074	0.8104
胖	91	1.95904	0.87031	0.576055	0.232017	0.4518	0.7843
淡	76	1.88081	0.938171	0.566749	0.291218	0.4585	0.809
揚	82	1.91381	0.815309	0.516877	-0.00113007	0.4211	0.8147
砍	58	1.76343	0.865186	0.542327	0.328078	0.4241	0.782
寸	51	1.70757	0.930702	0.53921	0.38788	0.438	0.8123
癌	101	2.00432	0.762959	0.582574	0.203381	0.4286	0.7357
剝	27	1.43136	0.924818	0.41055	0.120768	0.344	0.8379
油	125	2.09691	0.938925	0.618141	0.255336	0.4934	0.7982
斷	107	2.02938	0.946154	0.644338	0.476561	0.5098	0.7912
伏	28	1.44716	0.838932	0.366565	-0.119128	0.3015	0.8225
耐	46	1.66276	0.925184	0.523652	0.370963	0.4262	0.8139
廟	109	2.03743	0.906228	0.642765	0.457903	0.4984	0.7754
顧	71	1.85126	0.964971	0.565648	0.325586	0.4627	0.818
州	87	1.93952	0.87031	0.568365	0.220111	0.4452	0.7833
狠	33	1.51851	0.903438	0.475034	0.323774	0.3872	0.8151
踢	66	1.81954	0.887395	0.543342	0.257475	0.4325	0.796
避	74	1.86923	0.986741	0.571083	0.328368	0.4716	0.8258
降	86	1.9345	0.9813	0.599192	0.380093	0.4896	0.8171
喘	56	1.74819	0.831503	0.530778	0.291222	0.4113	0.7749
免	141	2.14922	0.929224	0.645055	0.318585	0.5074	0.7866
持	239	2.3784	0.897909	0.659278	0.0803386	0.5056	0.7669
淺	80	1.90309	0.933674	0.605816	0.455355	0.4812	0.7943
景	122	2.08636	0.893809	0.643784	0.397005	0.4961	0.7706
靜	74	1.86923	0.937418	0.575592	0.350781	0.4641	0.8063
題	116	2.06446	0.80827	0.596934	0.193684	0.4517	0.7567
軟	97	1.98677	0.939302	0.579923	0.213862	0.4691	0.8089
集	119	2.07555	0.926282	0.637639	0.381038	0.5001	0.7843
準	110	2.04139	0.973467	0.617908	0.329018	0.501	0.8108
配	125	2.09691	0.950782	0.648048	0.403973	0.5128	0.7913
嫁	65	1.81291	0.855737	0.545968	0.279466	0.4252	0.7788
剩	128	2.10721	0.926648	0.66182	0.458536	0.5143	0.7771
烤	81	1.90849	0.875822	0.579918	0.319366	0.4528	0.7808
彈	83	1.91908	0.94962	0.582317	0.317012	0.4729	0.8121
伴	84	1.92428	0.928855	0.592481	0.360515	0.4728	0.798
繫	52	1.716	0.943476	0.505803	0.210479	0.4184	0.8272
聚	80	1.90309	0.955068	0.593951	0.396385	0.4792	0.8068
虎	90	1.95424	0.910448	0.603831	0.376533	0.476	0.7883
調	86	1.9345	0.950007	0.598432	0.376315	0.4809	0.8036
哩	106	2.02531	0.896538	0.631893	0.420208	0.487	0.7707
殼	57	1.75587	0.872895	0.520261	0.228589	0.4147	0.7971
防	109	2.03743	0.947691	0.634429	0.416472	0.5038	0.7941
帳	57	1.75587	0.962574	0.51609	0.207861	0.4298	0.8328
顯	101	2.00432	0.947306	0.633296	0.455465	0.5029	0.7941
織	29	1.4624	0.893469	0.395538	0.00432088	0.3315	0.8381
裏	76	1.88081	0.944622	0.576975	0.342043	0.4666	0.8087
墳	27	1.43136	0.80827	0.373632	-0.0627164	0.3004	0.804
歪	35	1.54407	0.822175	0.469531	0.261977	0.3683	0.7844
瘦	82	1.91381	0.912929	0.586085	0.342834	0.465	0.7934
橫	51	1.70757	0.90518	0.509623	0.240831	0.4131	0.8106
予	187	2.27184	0.853562	0.66103	0.232689	0.4965	0.7511
堂	100	2	0.909037	0.598158	0.286656	0.4741	0.7926
峽	8	0.90309	0.54806	0.106002	-0.680726	0.0763	0.7198
扶	45	1.65321	0.869666	0.482921	0.181398	0.3902	0.808
解	140	2.14613	0.948847	0.667858	0.436083	0.5234	0.7837
佛	117	2.06819	0.863914	0.57556	0.082428	0.4498	0.7815
系	256	2.40824	0.790217	0.649714	-0.00741785	0.4778	0.7354
林	100	2	0.898253	0.600179	0.296699	0.4703	0.7836
矣	80	1.90309	0.874844	0.600829	0.430566	0.4639	0.7721
君	74	1.86923	0.910448	0.584837	0.396726	0.4636	0.7927
涼	50	1.69897	0.897223	0.524907	0.328387	0.4215	0.803
英	142	2.15229	0.882729	0.664218	0.409691	0.5064	0.7624
捏	48	1.68124	0.890421	0.508913	0.272797	0.4111	0.8078
糟	82	1.91381	0.898597	0.587283	0.348789	0.4609	0.7848
險	42	1.62325	0.92336	0.467855	0.146909	0.3886	0.8306
環	112	2.04922	0.902743	0.65472	0.501425	0.5042	0.7701
胃	71	1.85126	0.795609	0.513055	0.0641963	0.3989	0.7775
縫	35	1.54407	0.864549	0.476434	0.296286	0.3821	0.802
染	62	1.79239	0.957818	0.573651	0.444714	0.4646	0.8099
聊	70	1.8451	0.843451	0.566165	0.33646	0.4364	0.7708
箭	41	1.61278	0.90518	0.480862	0.225666	0.397	0.8256
扭	19	1.27875	0.734475	0.348891	0.0200433	0.2691	0.7713
游	106	2.02531	0.927383	0.622321	0.372634	0.4907	0.7885
龍	87	1.93952	0.973058	0.571463	0.235512	0.4706	0.8235
醉	58	1.76343	0.838632	0.538871	0.310899	0.4152	0.7705
廳	65	1.81291	0.855426	0.470812	-0.0940618	0.3839	0.8154
掩	32	1.50515	0.825359	0.422455	0.0804691	0.3394	0.8034
兇	54	1.73239	0.886057	0.528857	0.302965	0.4206	0.7953
齊	58	1.76343	0.960189	0.540485	0.31892	0.4439	0.8213
滴	86	1.9345	0.896538	0.601665	0.392381	0.4699	0.781
偏	123	2.08991	0.940437	0.639585	0.371356	0.5054	0.7902
租	108	2.03342	0.918653	0.542152	-0.0367478	0.4418	0.8149
移	72	1.85733	0.940815	0.559218	0.28544	0.4547	0.8131
枝	84	1.92428	0.924088	0.596163	0.378816	0.4755	0.7976
透	66	1.81954	0.950394	0.531447	0.198356	0.4394	0.8268
切	75	1.87506	0.931072	0.574848	0.339224	0.4635	0.8063
粗	91	1.95904	0.918653	0.615228	0.426707	0.4832	0.7854
編	132	2.12057	0.949234	0.659464	0.428812	0.5188	0.7867
敬	44	1.64345	0.921181	0.511337	0.335784	0.4172	0.8159
星	85	1.92942	0.930702	0.550265	0.143772	0.4461	0.8107
值	159	2.2014	0.896538	0.638875	0.217533	0.495	0.7748
父	94	1.97313	0.90763	0.577069	0.218068	0.456	0.7902
師	92	1.96379	0.902049	0.589243	0.291163	0.4678	0.7939
測	77	1.88649	0.820448	0.562428	0.262087	0.4365	0.7761
勾	25	1.39794	0.8471	0.415337	0.189617	0.3385	0.815
臥	34	1.53148	0.898597	0.462646	0.244732	0.379	0.8192
怎	35	1.54407	0.861382	0.439702	0.113725	0.3595	0.8176
絕	97	1.98677	0.94962	0.628273	0.45416	0.4991	0.7944
迎	68	1.83251	0.967381	0.548642	0.266342	0.4506	0.8213
砰	22	1.34242	0.730254	0.346252	-0.0789002	0.2707	0.7818
戲	199	2.29885	0.910095	0.695807	0.369117	0.5277	0.7584
緣	67	1.82607	0.958607	0.55373	0.300301	0.455	0.8217
識	55	1.74036	0.978397	0.545883	0.376843	0.4515	0.8271
限	171	2.233	0.896881	0.604391	0.00355605	0.4762	0.7879
喂	51	1.70757	0.765483	0.518361	0.284261	0.3896	0.7516
勢	110	2.04139	0.915066	0.585317	0.167039	0.4672	0.7982
印	99	1.99564	0.935542	0.600728	0.305315	0.4783	0.7962
溪	73	1.86332	0.874844	0.567637	0.319206	0.4448	0.7836
炒	90	1.95424	0.896196	0.57553	0.235875	0.4591	0.7977
猶	106	2.02531	0.924088	0.652806	0.524147	0.5071	0.7768
木	62	1.79239	0.953115	0.548107	0.317762	0.4489	0.819
牽	83	1.91908	0.929593	0.600781	0.408776	0.4769	0.7938
幕	82	1.91381	0.903785	0.6045	0.434354	0.4729	0.7823
電	153	2.18469	0.959793	0.61549	0.123829	0.4959	0.8057
蒙	69	1.83885	0.956245	0.560803	0.318232	0.4584	0.8174
母	116	2.06446	0.941574	0.603388	0.22576	0.4844	0.8028
尾	61	1.78533	0.827397	0.517456	0.174943	0.4076	0.7877
爛	76	1.88081	0.930702	0.561263	0.263954	0.4567	0.8137
財	58	1.76343	0.962972	0.537183	0.302511	0.4428	0.8243
趁	147	2.16732	0.960586	0.616694	0.153234	0.4965	0.8051
兜	15	1.17609	0.756962	0.308392	-0.0428517	0.251	0.8139
揹	34	1.53148	0.908685	0.44994	0.181578	0.3721	0.827
彎	59	1.77085	0.894831	0.548326	0.347884	0.434	0.7915
矮	63	1.79934	0.906929	0.525451	0.195791	0.4284	0.8153
嘿	73	1.86332	0.764472	0.546836	0.215826	0.4139	0.7569
鍵	32	1.50515	0.664141	0.379385	-0.133589	0.2812	0.7412
冒	89	1.94939	0.920096	0.623266	0.479666	0.4897	0.7857
牙	50	1.69897	0.90763	0.516006	0.284152	0.4207	0.8153
滾	44	1.64345	0.940815	0.482367	0.191802	0.4035	0.8365
湊	36	1.5563	0.883724	0.457101	0.183709	0.3756	0.8217
返	100	2	0.88306	0.609935	0.345186	0.4752	0.7791
笨	68	1.83251	0.895854	0.564093	0.343131	0.4471	0.7926
饒	29	1.4624	0.843754	0.422939	0.140507	0.3422	0.8091
割	37	1.5682	0.906929	0.471319	0.238332	0.387	0.8211
擁	42	1.62325	0.983384	0.506123	0.337104	0.4257	0.8411
唯	115	2.0607	0.896881	0.624724	0.336871	0.4816	0.7709
客	54	1.73239	0.932185	0.488229	0.101042	0.4044	0.8283
復	92	1.96379	0.862329	0.58493	0.269727	0.4549	0.7777
王	69	1.83885	0.927383	0.569788	0.362889	0.4564	0.801
灌	35	1.54407	0.869345	0.421526	0.023391	0.347	0.8232
笙	21	1.32222	0.648977	0.322769	-0.16838	0.2383	0.7383
寒	52	1.716	0.943858	0.504468	0.203843	0.4178	0.8282
頸	27	1.43136	0.841638	0.388822	0.0127774	0.3214	0.8266
款	141	2.14922	0.747147	0.588976	0.039874	0.4349	0.7384
質	92	1.96379	0.916497	0.581261	0.251492	0.4628	0.7962
然	145	2.16137	0.87844	0.655399	0.353621	0.4983	0.7603
告	104	2.01703	0.930702	0.605362	0.2995	0.4832	0.7982
貓	90	1.95424	0.871278	0.589992	0.307754	0.4622	0.7834
料	103	2.01284	0.932557	0.620542	0.3806	0.4924	0.7935
拆	74	1.86923	0.940058	0.59384	0.441473	0.4743	0.7987
露	75	1.87506	0.955852	0.603016	0.479221	0.4838	0.8023
敗	88	1.94448	0.778325	0.563348	0.188486	0.4362	0.7743
消	54	1.73239	0.937794	0.48673	0.0935922	0.4053	0.8327
網	139	2.14301	0.921543	0.579128	-0.000706588	0.4717	0.8145
怒	63	1.79934	0.958607	0.55259	0.330673	0.4534	0.8205
兵	96	1.98227	0.957424	0.596275	0.301196	0.4834	0.8107
孔	23	1.36173	0.843451	0.413409	0.228848	0.3342	0.8084
蹲	43	1.63347	0.925549	0.527696	0.430545	0.4287	0.8124
囉	85	1.92942	0.87517	0.542496	0.105159	0.4334	0.7989
坪	139	2.14301	0.863597	0.601449	0.110229	0.4648	0.7728
跨	127	2.1038	0.856985	0.596415	0.138065	0.4658	0.781
噴	65	1.81291	0.837734	0.508416	0.0928327	0.4138	0.8139
飄	61	1.78533	0.898597	0.544212	0.30792	0.4339	0.7973
福	83	1.91908	0.97265	0.595405	0.382057	0.4846	0.8139
躍	38	1.57978	0.84863	0.472457	0.228373	0.3808	0.806
結	98	1.99123	0.930702	0.629573	0.454618	0.4956	0.7872
程	59	1.77085	0.842543	0.502621	0.12073	0.4027	0.8012
穩	108	2.03342	0.905878	0.59749	0.23828	0.4713	0.7888
熟	94	1.97313	0.962574	0.604525	0.354523	0.489	0.8089
展	116	2.06446	0.82594	0.601814	0.217938	0.4578	0.7607
擦	63	1.79934	0.916497	0.537596	0.256152	0.4347	0.8086
捕	110	2.04139	0.897909	0.621919	0.348949	0.4869	0.7829
揮	49	1.6902	0.924453	0.521532	0.323443	0.4275	0.8197
鞋	36	1.5563	0.921181	0.473297	0.264204	0.3926	0.8295
抗	89	1.94939	0.781202	0.588796	0.308352	0.4383	0.7444
慘	69	1.83885	0.890084	0.542861	0.229061	0.4338	0.7991
餵	51	1.70757	0.825359	0.516076	0.272903	0.4045	0.7838
乏	112	2.04922	0.893129	0.654579	0.500723	0.4982	0.7611
府	48	1.68124	0.952336	0.501729	0.237093	0.4207	0.8385
鬆	62	1.79239	0.892112	0.537897	0.267014	0.4322	0.8035
示	89	1.94939	0.87844	0.586172	0.295308	0.4612	0.7868
異	92	1.96379	0.91151	0.624712	0.467443	0.4874	0.7802
宜	144	2.15836	0.833866	0.637972	0.27106	0.4795	0.7516
士	45	1.65321	0.871924	0.525069	0.390877	0.4168	0.7938
烈	54	1.73239	0.948076	0.527687	0.297147	0.4336	0.8217
莫	69	1.83885	0.936667	0.57477	0.38765	0.462	0.8038
藍	111	2.04532	0.937418	0.622563	0.346855	0.495	0.7951
禪	56	1.74819	0.81673	0.518804	0.231709	0.4042	0.7791
灘	18	1.25527	0.796423	0.342013	0.0175121	0.2745	0.8026
盯	53	1.72428	0.914709	0.520928	0.2745	0.4244	0.8147
尤	98	1.99123	0.860436	0.634386	0.478536	0.4782	0.7538
迄	161	2.20683	0.880744	0.65604	0.295528	0.498	0.7591
罰	53	1.72428	0.936291	0.478106	0.0616725	0.4018	0.8404
舞	102	2.0086	0.918293	0.61694	0.368411	0.4851	0.7863
探	62	1.79239	0.899285	0.544046	0.297576	0.4354	0.8003
目	42	1.62325	0.917574	0.492912	0.271443	0.4068	0.8253
獨	112	2.04922	0.932557	0.598045	0.21975	0.4773	0.7981
精	58	1.76343	0.959793	0.531856	0.276035	0.4416	0.8303
艘	102	2.0086	0.891097	0.615781	0.362648	0.4784	0.7769
尊	69	1.83885	0.906578	0.560352	0.315995	0.4452	0.7945
粒	72	1.85733	0.912219	0.566617	0.322212	0.4525	0.7986
討	44	1.64345	0.869666	0.523491	0.396188	0.4145	0.7918
捲	54	1.73239	0.906228	0.486183	0.0908749	0.4029	0.8287
妙	69	1.83885	0.952725	0.581539	0.421294	0.47	0.8082
運	67	1.82607	0.982549	0.566166	0.362107	0.4672	0.8252
安	57	1.75587	0.925915	0.544861	0.350851	0.4421	0.8114
箱	42	1.62325	0.932929	0.479785	0.206202	0.4011	0.836
添	71	1.85126	0.920819	0.54036	0.199906	0.4378	0.8102
逢	122	2.08636	0.89279	0.630119	0.329091	0.4908	0.7789
靈	51	1.70757	0.945387	0.519245	0.288654	0.429	0.8262
忍	60	1.77815	0.924453	0.559646	0.394303	0.4485	0.8014
暈	18	1.25527	0.766243	0.328718	-0.0485665	0.2659	0.8089
虛	37	1.5682	0.931072	0.464904	0.206448	0.3868	0.832
尖	43	1.63347	0.875822	0.500746	0.296603	0.4029	0.8046
容	52	1.716	0.932185	0.531538	0.338385	0.4323	0.8133
辣	30	1.47712	0.880085	0.44159	0.213356	0.361	0.8175
弦	27	1.43136	0.910802	0.385735	-0.00256562	0.3261	0.8454
塗	68	1.83251	0.929224	0.576933	0.406945	0.4642	0.8046
懸	36	1.5563	0.891097	0.477566	0.28542	0.3885	0.8135
遲	106	2.02531	0.951947	0.640657	0.463763	0.5074	0.792
抵	79	1.89763	0.870955	0.562784	0.248845	0.4464	0.7932
輪	86	1.9345	0.928118	0.565644	0.213359	0.461	0.815
社	136	2.13354	0.815309	0.638041	0.304864	0.4807	0.7534
鎮	81	1.90849	0.860751	0.57917	0.315651	0.451	0.7787
增	108	2.03342	0.88773	0.613985	0.320263	0.4759	0.7751
巢	41	1.61278	0.827397	0.487883	0.260556	0.3825	0.784
鋼	44	1.64345	0.828274	0.441942	-0.00911366	0.3551	0.8035
搬	88	1.94448	0.931814	0.611617	0.428387	0.4833	0.7902
撞	65	1.81291	0.900665	0.51865	0.143696	0.4227	0.815
備	67	1.82607	0.940437	0.54301	0.247023	0.4463	0.8219
價	89	1.94939	0.860121	0.536089	0.046395	0.4241	0.7911
霧	47	1.6721	0.813326	0.527263	0.376323	0.4042	0.7666
勿	92	1.96379	0.941954	0.611632	0.402438	0.489	0.7995
攤	46	1.66276	0.875496	0.514691	0.32643	0.4099	0.7964
唷	37	1.5682	0.560509	0.376751	-0.231672	0.2797	0.7424
冰	71	1.85126	0.943476	0.567981	0.337183	0.4637	0.8164
鼓	40	1.60206	0.932185	0.494536	0.30808	0.4073	0.8236
繞	93	1.96848	0.934047	0.606068	0.368456	0.4834	0.7976
訪	153	2.18469	0.844057	0.636244	0.226979	0.4838	0.7604
巧	56	1.74819	0.943476	0.536445	0.319386	0.4379	0.8163
妻	91	1.95904	0.91151	0.592017	0.311349	0.4687	0.7917
盛	86	1.9345	0.946154	0.586867	0.318838	0.4719	0.8041
罪	57	1.75587	0.905878	0.52988	0.276396	0.4327	0.8166
夫	68	1.83251	0.913996	0.5448	0.247247	0.439	0.8058
串	56	1.74819	0.916856	0.510834	0.192097	0.4173	0.8169
惟	160	2.20412	0.803547	0.66358	0.336649	0.4801	0.7235
抹	56	1.74819	0.893809	0.528589	0.280343	0.4234	0.801
功	68	1.83251	0.975104	0.549449	0.270352	0.4539	0.8261
拋	36	1.5563	0.906578	0.474231	0.268843	0.3883	0.8188
現	121	2.08279	0.967381	0.636647	0.366353	0.5104	0.8017
煩	47	1.6721	0.839531	0.496558	0.223716	0.3967	0.7989
寄	130	2.11394	0.877784	0.560005	-0.0565611	0.4461	0.7966
坑	21	1.32222	0.862646	0.378152	0.106878	0.3119	0.8248
豈	35	1.54407	0.886391	0.478929	0.308687	0.3864	0.8068
積	43	1.63347	0.928118	0.498482	0.285353	0.4105	0.8235
許	165	2.21748	0.649558	0.638796	0.195458	0.4393	0.6877
銀	40	1.60206	0.921181	0.502684	0.348573	0.4121	0.8198
災	38	1.57978	0.90518	0.497103	0.350868	0.4033	0.8113
味	69	1.83885	0.870955	0.55359	0.282383	0.4349	0.7856
計	123	2.08991	0.923724	0.576418	0.0574133	0.4605	0.7989
補	96	1.98227	0.957818	0.590909	0.274528	0.4784	0.8096
怨	42	1.62325	0.893469	0.517473	0.393513	0.4161	0.8041
拼	34	1.53148	0.969805	0.462201	0.242517	0.3919	0.8479
醫	56	1.74819	0.940437	0.522163	0.248403	0.4288	0.8212
截	50	1.69897	0.925549	0.5225	0.316427	0.4238	0.8111
格	44	1.64345	0.949234	0.495879	0.258955	0.4151	0.8371
眉	44	1.64345	0.811916	0.51164	0.337289	0.3956	0.7732
腮	13	1.11394	0.813326	0.264878	-0.175339	0.2172	0.82
擋	50	1.69897	0.967784	0.461403	0.012773	0.3933	0.8524
飽	52	1.716	0.83654	0.52212	0.291578	0.4048	0.7753
顫	17	1.23045	0.709743	0.262596	-0.343731	0.2116	0.8058
工	70	1.8451	0.940815	0.532609	0.169684	0.4361	0.8188
宰	24	1.38021	0.852324	0.374804	0.0120638	0.3109	0.8295
投	107	2.02938	0.9813	0.616	0.335722	0.5005	0.8125
版	127	2.1038	0.834162	0.616886	0.239805	0.4742	0.7687
傻	38	1.57978	0.899629	0.493272	0.331828	0.3996	0.8101
農	59	1.77085	0.855737	0.528216	0.247935	0.4156	0.7868
眠	35	1.54407	0.902743	0.489273	0.360094	0.3968	0.811
鐘	55	1.74036	0.924088	0.486355	0.0809856	0.3992	0.8208
己	63	1.79934	0.945387	0.56828	0.408654	0.459	0.8077
野	50	1.69897	0.926282	0.519207	0.300061	0.4244	0.8174
華	100	2	0.838333	0.586063	0.226546	0.4508	0.7692
鎖	56	1.74819	0.913996	0.516644	0.220977	0.4237	0.8201
盞	40	1.60206	0.914353	0.481031	0.24096	0.3956	0.8224
執	46	1.66276	0.919734	0.532577	0.41532	0.4316	0.8104
縮	44	1.64345	0.900319	0.469556	0.12813	0.3879	0.8261
撿	51	1.70757	0.882066	0.516987	0.277434	0.4139	0.8006
制	79	1.89763	0.916856	0.562203	0.245961	0.4501	0.8006
獎	153	2.18469	0.899629	0.608167	0.0874355	0.4751	0.7812
充	25	1.39794	0.92336	0.392569	0.0764564	0.3307	0.8424
賊	40	1.60206	0.858864	0.452163	0.0974858	0.3658	0.809
滑	55	1.74036	0.866461	0.513835	0.217563	0.4104	0.7987
呼	44	1.64345	0.879426	0.489626	0.227877	0.3988	0.8145
蛋	82	1.91381	0.899974	0.565684	0.241441	0.453	0.8008
壁	26	1.41497	0.871278	0.421434	0.196955	0.3433	0.8146
仰	35	1.54407	0.884722	0.467837	0.253559	0.3811	0.8146
撐	59	1.77085	0.958213	0.499818	0.1068	0.4128	0.8259
擬	153	2.18469	0.818442	0.654733	0.318869	0.4828	0.7374
瓷	47	1.6721	0.661145	0.486783	0.175135	0.3462	0.7112
卷	76	1.88081	0.926282	0.561227	0.263773	0.4519	0.8052
鍋	66	1.81954	0.891435	0.554842	0.314631	0.4406	0.7941
折	68	1.83251	0.944622	0.524739	0.147543	0.4327	0.8246
幌	6	0.778151	0.374276	0.104457	-0.519985	0.06	0.5744
寶	71	1.85126	0.938925	0.577348	0.383734	0.4654	0.8061
迷	51	1.70757	0.96457	0.506777	0.226689	0.4225	0.8337
減	102	2.0086	0.942334	0.65446	0.554883	0.5129	0.7837
燙	30	1.47712	0.833274	0.418306	0.0976353	0.3359	0.803
碼	78	1.89209	0.770574	0.496269	-0.0742781	0.3857	0.7772
仙	32	1.50515	0.859806	0.441966	0.177441	0.3606	0.8159
枕	24	1.38021	0.860751	0.415667	0.215154	0.3396	0.817
射	58	1.76343	0.920457	0.506811	0.151561	0.4167	0.8222
贏	106	2.02531	0.940815	0.614271	0.332628	0.4924	0.8016
毀	60	1.77815	0.922632	0.534319	0.26843	0.4336	0.8115
密	44	1.64345	0.918653	0.515062	0.354297	0.4189	0.8133
思	62	1.79239	0.912929	0.546677	0.310651	0.4392	0.8034
盼	69	1.83885	0.924818	0.547123	0.250246	0.4441	0.8117
仇	28	1.44716	0.979639	0.404174	0.0677897	0.3505	0.8672
軍	90	1.95424	0.896538	0.607111	0.392834	0.4747	0.7819
呵	47	1.6721	0.875822	0.505486	0.268092	0.41	0.8111
湯	69	1.83885	0.843754	0.552267	0.275813	0.4311	0.7806
竹	68	1.83251	0.927383	0.560297	0.324265	0.453	0.8085
查	91	1.95904	0.950782	0.594377	0.323077	0.4799	0.8074
保	73	1.86332	1.00789	0.595336	0.456873	0.4927	0.8276
滅	55	1.74036	0.947306	0.546124	0.378038	0.4452	0.8152
熊	53	1.72428	0.837734	0.485208	0.0969705	0.3887	0.8011
杖	15	1.17609	0.753009	0.275668	-0.205489	0.2352	0.8532
蟲	65	1.81291	0.935917	0.565261	0.37535	0.4556	0.806
十	94	1.97313	0.873219	0.575669	0.211109	0.4519	0.785
吾	57	1.75587	0.86774	0.545791	0.355476	0.4273	0.7829
員	85	1.92942	0.911155	0.593199	0.357153	0.4675	0.7881
撒	44	1.64345	0.852942	0.522321	0.390376	0.4095	0.784
攻	74	1.86923	0.876148	0.543772	0.192633	0.4348	0.7996
飲	44	1.64345	0.869023	0.532028	0.43862	0.4186	0.7868
擊	26	1.41497	0.853562	0.368339	-0.0669287	0.3062	0.8313
惹	54	1.73239	0.960586	0.51256	0.22197	0.4244	0.828
奉	62	1.79239	0.943858	0.542024	0.287527	0.4424	0.8162
愁	38	1.57978	0.92775	0.499207	0.361322	0.409	0.8193
挾	35	1.54407	0.900319	0.430076	0.0658872	0.3552	0.8259
澡	38	1.57978	0.859492	0.492354	0.327264	0.3928	0.7978
築	58	1.76343	0.911155	0.541957	0.326238	0.4353	0.8032
遞	22	1.34242	0.880085	0.392947	0.153173	0.3287	0.8365
循	87	1.93952	0.912929	0.603805	0.396249	0.4761	0.7885
創	135	2.13033	0.868702	0.614269	0.191037	0.4701	0.7653
公	78	1.89209	0.94424	0.544561	0.165733	0.443	0.8135
坡	38	1.57978	0.815593	0.491678	0.323906	0.3811	0.7751
兩	49	1.6902	0.947306	0.496519	0.199129	0.4137	0.8332
碎	44	1.64345	0.916856	0.503966	0.299148	0.413	0.8195
操	54	1.73239	0.949234	0.522054	0.269155	0.432	0.8275
歇	29	1.4624	0.932557	0.396883	0.0110103	0.3362	0.8471
玉	47	1.6721	0.902396	0.467141	0.0775142	0.3874	0.8293
狀	40	1.60206	0.926648	0.489644	0.283767	0.4019	0.8208
擱	35	1.54407	0.905878	0.466537	0.247099	0.3848	0.8248
炸	37	1.5682	0.944622	0.452967	0.147122	0.3809	0.8409
宗	62	1.79239	0.892451	0.538095	0.268001	0.4294	0.798
謎	40	1.60206	0.868702	0.477318	0.222506	0.383	0.8024
鴨	69	1.83885	0.902396	0.555458	0.291671	0.4442	0.7997
距	96	1.98227	0.869666	0.567474	0.158057	0.4449	0.784
果	40	1.60206	0.953505	0.487755	0.27438	0.4083	0.8371
形	74	1.86923	0.912929	0.595729	0.450859	0.4714	0.7913
掌	66	1.81954	0.880414	0.539033	0.236063	0.435	0.807
癮	27	1.43136	0.932185	0.410393	0.119987	0.3467	0.8448
臂	26	1.41497	0.881735	0.408605	0.133194	0.3362	0.8228
跪	36	1.5563	0.871278	0.43492	0.0734697	0.3572	0.8213
乍	33	1.51851	0.925184	0.466304	0.280385	0.3854	0.8265
扎	19	1.27875	0.767766	0.307165	-0.187339	0.2508	0.8165
池	46	1.66276	0.909389	0.476132	0.134792	0.39	0.8191
熬	34	1.53148	0.921181	0.410021	-0.0168155	0.3445	0.8402
焉	40	1.60206	0.877456	0.503749	0.353869	0.4031	0.8002
幾	66	1.81954	0.929593	0.568173	0.380888	0.4563	0.8031
歐	81	1.90849	0.79588	0.5508	0.174649	0.4131	0.75
磚	41	1.61278	0.857924	0.44424	0.0436504	0.3617	0.8142
臭	75	1.87506	0.879097	0.555051	0.240833	0.4401	0.7929
麵	33	1.51851	0.782253	0.455795	0.228155	0.3516	0.7714
服	55	1.74036	0.882066	0.5412	0.353568	0.4302	0.7949
枯	31	1.49136	0.90101	0.430603	0.139553	0.3543	0.8228
墨	53	1.72428	0.838932	0.476027	0.0513435	0.3892	0.8176
沉	36	1.5563	0.919734	0.478694	0.291025	0.3943	0.8237
溜	26	1.41497	0.848937	0.411932	0.14973	0.3335	0.8096
夥	26	1.41497	0.893809	0.396977	0.0754017	0.3335	0.8401
扳	11	1.04139	0.820736	0.282749	0.0112802	0.2316	0.8191
施	39	1.59106	0.940058	0.464843	0.175326	0.3874	0.8334
附	89	1.94939	0.86742	0.583981	0.284417	0.4586	0.7853
繼	175	2.24304	0.833866	0.652455	0.228894	0.4851	0.7435
妹	31	1.49136	0.720333	0.399925	-0.0129183	0.3185	0.7964
骨	38	1.57978	0.915781	0.49951	0.362827	0.4074	0.8156
鏡	39	1.59106	0.882397	0.462694	0.164646	0.3758	0.8122
奪	40	1.60206	0.95117	0.473508	0.203572	0.3968	0.838
哥	41	1.61278	0.7716	0.460748	0.125696	0.3586	0.7783
催	44	1.64345	0.896881	0.51202	0.339177	0.4132	0.807
噢	42	1.62325	0.734004	0.469002	0.152614	0.3601	0.7678
畢	33	1.51851	0.935542	0.427187	0.0859731	0.3702	0.8666
晃	38	1.57978	0.842241	0.499051	0.360547	0.3943	0.7901
鷹	34	1.53148	0.948462	0.406706	-0.0332913	0.3481	0.8559
窄	53	1.72428	0.924818	0.51869	0.26338	0.4246	0.8186
餅	56	1.74819	0.915424	0.516567	0.220591	0.4225	0.8179
井	31	1.49136	0.919374	0.442654	0.19945	0.3682	0.8318
職	79	1.89763	0.892112	0.568084	0.275188	0.4489	0.7902
患	65	1.81291	0.886391	0.564991	0.374011	0.4451	0.7878
鏈	28	1.44716	0.722849	0.370682	-0.0986681	0.2908	0.7845
盒	40	1.60206	0.887395	0.484927	0.260323	0.3925	0.8094
壺	34	1.53148	0.814458	0.461135	0.237221	0.3607	0.7822
怔	14	1.14613	0.517412	0.235486	-0.364805	0.159	0.6752
拐	24	1.38021	0.878769	0.388506	0.0801612	0.3211	0.8265
嚐	37	1.5682	0.920096	0.461371	0.188892	0.3822	0.8284
亡	31	1.49136	0.912574	0.445157	0.211889	0.3677	0.826
婚	55	1.74036	0.850473	0.529509	0.295462	0.4172	0.7879
臀	17	1.23045	0.873544	0.333891	0.0106048	0.2795	0.8371
仁	26	1.41497	0.806041	0.383809	0.00996072	0.3077	0.8017
揉	25	1.39794	0.827397	0.424356	0.23444	0.3394	0.7998
麻	29	1.4624	0.962175	0.43002	0.1757	0.3647	0.8481
劃	43	1.63347	0.954677	0.520121	0.3929	0.4291	0.825
繪	25	1.39794	0.811916	0.409166	0.158942	0.3241	0.7921
戒	51	1.70757	0.882066	0.532541	0.354735	0.4255	0.799
遮	25	1.39794	0.957031	0.408507	0.15567	0.3467	0.8487
敲	52	1.716	0.965372	0.521252	0.287263	0.4329	0.8305
紫	34	1.53148	0.921906	0.462324	0.24313	0.3847	0.8321
爽	38	1.57978	0.90309	0.473825	0.235174	0.3901	0.8233
淨	26	1.41497	0.940437	0.432979	0.254333	0.3663	0.846
曲	69	1.83885	0.902396	0.565322	0.340691	0.4483	0.793
賜	52	1.716	0.962175	0.520619	0.284117	0.4305	0.8269
颳	24	1.38021	0.851706	0.410855	0.191235	0.3399	0.8273
罷	37	1.5682	0.932929	0.469657	0.23007	0.3885	0.8272
咦	43	1.63347	0.754241	0.461085	0.0994882	0.3519	0.7632
瓦	33	1.51851	0.92336	0.446793	0.183418	0.372	0.8326
纏	28	1.44716	0.949234	0.417572	0.134376	0.3536	0.8468
義	57	1.75587	0.928855	0.511742	0.186248	0.4184	0.8176
釣	18	1.25527	0.927015	0.363293	0.123271	0.3076	0.8467
購	93	1.96848	0.862329	0.596898	0.322881	0.458	0.7673
肥	55	1.74036	0.966979	0.526442	0.280221	0.438	0.832
肺	34	1.53148	0.856049	0.453414	0.198846	0.3679	0.8114
奶	31	1.49136	0.831503	0.435197	0.162385	0.3472	0.7978
抖	17	1.23045	0.778064	0.323416	-0.0414556	0.2598	0.8033
陰	27	1.43136	0.948847	0.382302	-0.019627	0.3292	0.8611
吊	38	1.57978	0.888401	0.422972	-0.0175668	0.3561	0.8419
陽	32	1.50515	0.892451	0.460512	0.269614	0.3761	0.8167
髒	61	1.78533	0.879097	0.540445	0.289198	0.4276	0.7912
恐	89	1.94939	0.854493	0.592201	0.325275	0.4541	0.7668
鳴	31	1.49136	0.948847	0.407587	0.0251658	0.3438	0.8435
謝	33	1.51851	0.911155	0.43417	0.120679	0.3634	0.837
暨	145	2.16137	0.796423	0.563246	-0.104383	0.4248	0.7542
銅	49	1.6902	0.952725	0.526252	0.3469	0.434	0.8247
悶	48	1.68124	0.938171	0.525669	0.356075	0.4321	0.822
摘	47	1.6721	0.962175	0.524655	0.36336	0.4373	0.8335
欠	46	1.66276	0.952725	0.488483	0.196173	0.4114	0.8422
敵	44	1.64345	0.920096	0.504085	0.29974	0.4134	0.8201
駕	40	1.60206	0.880744	0.47024	0.187326	0.3887	0.8266
扣	45	1.65321	0.947306	0.510947	0.320689	0.4224	0.8267
商	74	1.86923	0.929224	0.537865	0.163275	0.4368	0.8121
石	74	1.86923	0.889747	0.560627	0.276404	0.4434	0.7909
舌	25	1.39794	0.903438	0.386011	0.0438637	0.3234	0.8378
鹹	33	1.51851	0.862329	0.449889	0.198802	0.3636	0.8082
后	38	1.57978	0.849244	0.482334	0.277463	0.3836	0.7953
鵝	17	1.23045	0.813326	0.308854	-0.11383	0.2557	0.8279
辨	31	1.49136	0.929224	0.407671	0.0255827	0.3433	0.8421
慣	34	1.53148	0.909389	0.462745	0.24522	0.3807	0.8227
咱	30	1.47712	0.861066	0.439042	0.200694	0.3558	0.8104
蹄	9	0.954243	0.650528	0.11402	-0.709829	0.0919	0.806
瞞	30	1.47712	0.792096	0.442583	0.21829	0.3434	0.7759
磨	37	1.5682	0.912219	0.472985	0.24661	0.3878	0.8199
貪	45	1.65321	0.968996	0.514074	0.336228	0.4292	0.8349
扯	43	1.63347	0.943476	0.528104	0.432572	0.4322	0.8184
司	70	1.8451	0.837137	0.546447	0.238459	0.4206	0.7697
俏	14	1.14613	1.00436	0.301379	-0.0373142	0.271	0.8992
置	67	1.82607	0.88941	0.551982	0.291612	0.4359	0.7897
淚	58	1.76343	0.909037	0.557342	0.402701	0.4437	0.7961
仗	42	1.62325	0.913284	0.500122	0.307278	0.4104	0.8206
勁	31	1.49136	0.889747	0.437884	0.175741	0.3634	0.8299
辭	38	1.57978	0.981716	0.505135	0.390785	0.423	0.8374
俄	89	1.94939	0.916856	0.60979	0.412691	0.4796	0.7865
周	97	1.98677	0.87844	0.613472	0.380597	0.4736	0.772
遷	59	1.77085	0.850165	0.537273	0.292951	0.4173	0.7767
傘	49	1.6902	0.874844	0.5323	0.376961	0.426	0.8003
嚴	60	1.77815	0.938925	0.51182	0.156607	0.4222	0.8249
擇	45	1.65321	0.930332	0.504592	0.289102	0.4176	0.8276
港	94	1.97313	0.866781	0.613797	0.400605	0.4698	0.7654
百	69	1.83885	0.960189	0.549524	0.262179	0.4505	0.8198
堵	38	1.57978	0.941195	0.489395	0.312558	0.4061	0.8298
額	50	1.69897	0.887395	0.496985	0.189617	0.4039	0.8127
狂	31	1.49136	0.955852	0.44871	0.229547	0.3775	0.8413
智	53	1.72428	0.894831	0.521955	0.279604	0.4208	0.8062
傑	9	0.954243	0.888401	0.167222	-0.445413	0.1455	0.8701
攔	20	1.30103	0.872571	0.35285	0.00968842	0.2959	0.8386
僵	10	1	0.858237	0.225203	-0.218929	0.1914	0.8499
羞	14	1.14613	0.790753	0.279787	-0.144627	0.2259	0.8074
兄	56	1.74819	0.942714	0.533932	0.306898	0.4398	0.8237
曬	28	1.44716	0.870955	0.375395	-0.0752457	0.3091	0.8234
製	65	1.81291	0.945387	0.554492	0.321829	0.4518	0.8148
托	33	1.51851	0.842846	0.478807	0.342527	0.3773	0.788
興	39	1.59106	0.966174	0.493775	0.319121	0.4125	0.8354
掙	19	1.27875	0.733298	0.320283	-0.122142	0.2536	0.7918
泡	76	1.88081	0.849551	0.592714	0.420266	0.4507	0.7604
召	18	1.25527	0.973058	0.347181	0.0431933	0.3017	0.869
醋	15	1.17609	0.837734	0.295011	-0.109355	0.2448	0.8298
褪	9	0.954243	0.854493	0.206053	-0.252424	0.1743	0.8459
甫	110	2.04139	0.870632	0.621273	0.345742	0.4772	0.7681
嚼	46	1.66276	0.851706	0.514578	0.325867	0.4077	0.7923
禍	43	1.63347	0.965372	0.510228	0.343733	0.4265	0.8359
續	51	1.70757	0.90763	0.525257	0.318537	0.4284	0.8156
墊	20	1.30103	0.919374	0.359128	0.0408887	0.3063	0.8529
撥	60	1.77815	0.92336	0.507163	0.133463	0.4142	0.8167
繳	88	1.94448	0.887395	0.567951	0.211367	0.448	0.7888
私	58	1.76343	0.917215	0.510264	0.168724	0.4151	0.8135
汁	29	1.4624	0.899974	0.409096	0.0717085	0.3418	0.8355
翅	22	1.34242	0.727694	0.348523	-0.0676155	0.2784	0.7988
嗚	8	0.90309	0.733298	0.137795	-0.522713	0.1116	0.8099
六	83	1.91908	0.898597	0.586058	0.335604	0.4624	0.789
索	41	1.61278	0.877456	0.432578	-0.0143108	0.3625	0.838
逛	70	1.8451	0.894831	0.559172	0.301706	0.4432	0.7926
炮	25	1.39794	0.866781	0.402786	0.127237	0.3296	0.8183
捐	71	1.85126	0.914353	0.564635	0.320553	0.4512	0.7991
決	46	1.66276	0.941195	0.506334	0.284893	0.4157	0.821
琴	41	1.61278	0.907982	0.48602	0.251299	0.3998	0.8226
哉	27	1.43136	0.863914	0.424407	0.189638	0.3436	0.8096
牌	71	1.85126	0.962175	0.570625	0.350322	0.4666	0.8177
填	59	1.77085	0.941574	0.539876	0.305886	0.4434	0.8213
拒	52	1.716	0.886725	0.532703	0.344175	0.4227	0.7935
素	26	1.41497	0.940058	0.399481	0.0878467	0.3384	0.8471
浮	38	1.57978	1.0013	0.49136	0.322324	0.418	0.8507
翹	28	1.44716	0.779892	0.414329	0.118259	0.3279	0.7914
擲	17	1.23045	0.836839	0.292741	-0.193912	0.2476	0.8458
吼	26	1.41497	0.904134	0.385274	0.0172407	0.3239	0.8407
櫻	6	0.778151	0.545918	0.110877	-0.488079	0.0788	0.7107
逾	93	1.96848	0.860751	0.598384	0.330266	0.4592	0.7674
鼻	30	1.47712	0.937042	0.40923	0.0525277	0.3467	0.8472
魂	22	1.34242	0.95117	0.404285	0.209525	0.3453	0.8541
京	27	1.43136	0.853252	0.413035	0.13312	0.3346	0.8101
趨	99	1.99564	0.852942	0.608221	0.342552	0.4676	0.7688
殿	21	1.32222	0.885389	0.411406	0.272151	0.3376	0.8206
皺	19	1.27875	0.843148	0.364824	0.0992264	0.2989	0.8193
暖	28	1.44716	0.997402	0.423919	0.165923	0.3658	0.8629
搜	15	1.17609	0.925915	0.293693	-0.115902	0.2566	0.8737
拾	19	1.27875	0.727926	0.281057	-0.317096	0.2319	0.8251
云	45	1.65321	0.854493	0.50655	0.298834	0.3983	0.7863
剪	46	1.66276	0.956638	0.516588	0.335858	0.4282	0.8289
搓	14	1.14613	0.850473	0.271666	-0.184989	0.2257	0.8308
雄	44	1.64345	0.726767	0.500402	0.281434	0.3738	0.747
鑽	40	1.60206	0.952336	0.480996	0.240786	0.4037	0.8393
巷	84	1.92428	0.849858	0.4857	-0.170188	0.3957	0.8147
席	47	1.6721	0.943095	0.492837	0.205226	0.4094	0.8307
徒	47	1.6721	0.962175	0.504918	0.265269	0.4209	0.8336
溫	29	1.4624	0.951558	0.437849	0.214608	0.3688	0.8423
峰	17	1.23045	0.879426	0.302464	-0.145587	0.259	0.8563
醜	41	1.61278	0.884057	0.520241	0.421376	0.4151	0.7979
擔	34	1.53148	0.889074	0.471647	0.289466	0.3851	0.8165
適	31	1.49136	0.94962	0.42662	0.119756	0.3622	0.849
儘	47	1.6721	0.899629	0.503386	0.257654	0.4088	0.8121
冠	63	1.79934	0.909742	0.523083	0.184021	0.4249	0.8123
誤	49	1.6902	0.948847	0.508608	0.25921	0.4195	0.8248
搔	8	0.90309	0.658961	0.151782	-0.453196	0.1154	0.7603
罩	18	1.25527	0.899285	0.356109	0.0875679	0.3002	0.843
艦	16	1.20412	0.868702	0.287906	-0.182451	0.244	0.8475
賴	47	1.6721	0.950394	0.539089	0.435098	0.4427	0.8212
嘶	11	1.04139	0.696588	0.198896	-0.405474	0.1621	0.815
懶	27	1.43136	0.883724	0.403602	0.0862363	0.3339	0.8273
綁	59	1.77085	0.937418	0.522547	0.21976	0.4276	0.8183
虧	40	1.60206	0.903438	0.515388	0.411717	0.4153	0.8058
焚	11	1.04139	0.911155	0.288837	0.0415342	0.2458	0.851
瘋	17	1.23045	0.90518	0.364681	0.16363	0.3048	0.8358
突	48	1.68124	0.873544	0.503686	0.246816	0.41	0.814
淋	23	1.36173	0.877456	0.421894	0.271018	0.3457	0.8194
率	90	1.95424	0.843754	0.580366	0.259913	0.4499	0.7752
塔	39	1.59106	0.772885	0.472357	0.212669	0.3614	0.7651
吋	69	1.83885	0.819301	0.494201	-0.0127776	0.3963	0.8019
貫	19	1.27875	0.800245	0.352839	0.0396629	0.2846	0.8066
亞	26	1.41497	0.853872	0.390544	0.0434316	0.3238	0.8291
吶	31	1.49136	0.803547	0.41348	0.0544507	0.3276	0.7923
卡	89	1.94939	0.76853	0.543582	0.0836367	0.4091	0.7526
映	31	1.49136	0.892112	0.445868	0.215423	0.3653	0.8193
棄	58	1.76343	0.948462	0.534052	0.286949	0.436	0.8164
賠	58	1.76343	0.970211	0.545882	0.345745	0.4527	0.8293
舔	10	1	0.841939	0.253626	-0.0776668	0.2116	0.8343
碳	11	1.04139	0.590743	0.158546	-0.606015	0.1282	0.8086
浪	39	1.59106	0.926282	0.444046	0.0719648	0.3714	0.8364
踩	65	1.81291	0.920457	0.57261	0.411876	0.457	0.7981
售	75	1.87506	0.813326	0.554595	0.238568	0.4236	0.7638
藤	14	1.14613	0.914353	0.291302	-0.087398	0.2495	0.8565
渴	25	1.39794	0.817015	0.366159	-0.054802	0.2956	0.8073
熄	18	1.25527	0.884722	0.350495	0.0596634	0.2941	0.8391
臻	38	1.57978	0.79588	0.499477	0.362664	0.3818	0.7644
翼	26	1.41497	0.84863	0.390832	0.0448619	0.3308	0.8464
尿	36	1.5563	0.917933	0.469659	0.24612	0.3893	0.8289
鹽	53	1.72428	0.89279	0.534607	0.342484	0.431	0.8062
舟	27	1.43136	0.825649	0.41838	0.159683	0.3337	0.7976
悲	39	1.59106	0.891773	0.500498	0.352532	0.4021	0.8034
捂	6	0.778151	0.789414	0.0796275	-0.643388	0.0684	0.859
卸	11	1.04139	0.886725	0.259718	-0.103188	0.2225	0.8567
術	31	1.49136	0.895513	0.447263	0.222352	0.3668	0.8201
粥	14	1.14613	0.889074	0.290597	-0.0908994	0.2525	0.8689
謀	47	1.6721	0.920457	0.535966	0.419577	0.4329	0.8077
灶	19	1.27875	0.863597	0.379041	0.169888	0.3107	0.8197
腫	23	1.36173	0.924088	0.404598	0.185057	0.3414	0.8438
注	14	1.14613	0.901356	0.287616	-0.105715	0.2441	0.8487
扛	42	1.62325	0.908685	0.49823	0.297874	0.4081	0.8191
揍	20	1.30103	0.720561	0.334597	-0.0810297	0.2648	0.7914
歡	19	1.27875	1.0048	0.394433	0.246385	0.3415	0.8658
癢	19	1.27875	0.897223	0.337187	-0.0381264	0.2858	0.8476
扮	21	1.32222	0.911864	0.397896	0.205003	0.3328	0.8364
甩	22	1.34242	0.831208	0.382328	0.100396	0.3137	0.8205
脹	19	1.27875	0.77237	0.350582	0.0284452	0.2771	0.7904
觸	31	1.49136	0.937418	0.423821	0.105846	0.3594	0.848
鳳	27	1.43136	0.980468	0.409318	0.114645	0.3602	0.88
雜	36	1.5563	0.870632	0.448603	0.141472	0.3692	0.823
膝	26	1.41497	0.898253	0.401971	0.100226	0.3344	0.8319
俱	43	1.63347	0.919013	0.505199	0.318735	0.413	0.8175
助	62	1.79239	0.941954	0.538452	0.269775	0.4418	0.8205
桶	47	1.6721	0.881405	0.502448	0.252991	0.4105	0.817
灑	36	1.5563	0.93968	0.484589	0.320327	0.4025	0.8306
樑	23	1.36173	0.865823	0.385089	0.0880978	0.3187	0.8276
乖	50	1.69897	0.840132	0.507137	0.240073	0.3979	0.7846
卵	26	1.41497	0.802444	0.389954	0.0404977	0.3113	0.7983
凍	17	1.23045	0.88706	0.350372	0.0925165	0.292	0.8334
審	28	1.44716	0.898253	0.40697	0.0816828	0.3375	0.8293
耍	29	1.4624	0.953115	0.41983	0.125057	0.3616	0.8613
泥	37	1.5682	0.902049	0.504595	0.403715	0.4063	0.8052
潮	28	1.44716	0.962972	0.387781	-0.013685	0.3345	0.8626
酥	10	1	0.848937	0.217955	-0.254952	0.185	0.8488
慌	25	1.39794	0.778847	0.390275	0.0650549	0.3082	0.7897
煤	26	1.41497	0.88706	0.374584	-0.0358881	0.3154	0.842
棚	25	1.39794	0.898253	0.396242	0.0947136	0.329	0.8303
腹	42	1.62325	0.912219	0.477048	0.192599	0.3949	0.8278
品	33	1.51851	0.885389	0.468145	0.289539	0.3799	0.8115
蒼	14	1.14613	0.954286	0.299362	-0.0473409	0.2579	0.8615
趴	38	1.57978	0.865823	0.485508	0.29324	0.3903	0.8039
暫	49	1.6902	0.883724	0.534544	0.38811	0.424	0.7932
鄰	34	1.53148	0.95546	0.451097	0.187329	0.3805	0.8435
掃	44	1.64345	0.972243	0.51198	0.338979	0.4295	0.8389
屍	16	1.20412	0.828859	0.299312	-0.125759	0.2481	0.8289
巨	48	1.68124	0.918293	0.504529	0.251007	0.4122	0.817
逝	36	1.5563	0.888066	0.480817	0.301577	0.3885	0.808
雕	21	1.32222	0.865823	0.397359	0.202336	0.325	0.8179
簽	45	1.65321	0.924818	0.490753	0.220324	0.406	0.8273
豆	21	1.32222	0.933674	0.391166	0.171557	0.3321	0.849
寂	11	1.04139	0.655411	0.21265	-0.337113	0.1644	0.7731
腔	25	1.39794	0.93968	0.40234	0.125017	0.3405	0.8463
武	17	1.23045	0.942334	0.331485	-0.00135046	0.287	0.8658
閒	46	1.66276	0.880744	0.513232	0.319179	0.4092	0.7973
稅	56	1.74819	0.785156	0.499805	0.137285	0.3844	0.7691
跌	79	1.89763	0.753501	0.537611	0.123734	0.4131	0.7684
刊	95	1.97772	0.779369	0.56637	0.158701	0.4207	0.7428
啪	17	1.23045	0.833866	0.345257	0.0670949	0.2828	0.8191
乎	47	1.6721	0.87031	0.534707	0.41332	0.4229	0.7909
檔	102	2.0086	0.80799	0.522531	-0.100806	0.4105	0.7856
象	45	1.65321	0.907279	0.517714	0.35432	0.4194	0.8101
抄	32	1.50515	0.943476	0.455111	0.242774	0.3802	0.8354
壩	10	1	0.764977	0.23075	-0.191359	0.1864	0.8078
肚	33	1.51851	0.88306	0.449681	0.19777	0.3664	0.8148
鑲	19	1.27875	0.966576	0.326779	-0.0898544	0.2842	0.8697
膽	29	1.4624	0.878112	0.419869	0.125247	0.3453	0.8224
鬚	7	0.845098	0.738975	0.158542	-0.341423	0.1314	0.8288
固	25	1.39794	0.883724	0.411133	0.16872	0.3368	0.8192
澆	27	1.43136	0.854804	0.413674	0.136296	0.3364	0.8132
筍	17	1.23045	0.777284	0.331248	-0.00253172	0.2647	0.7991
衰	40	1.60206	0.963371	0.497966	0.325124	0.4161	0.8356
駐	108	2.03342	0.825359	0.607095	0.28602	0.4569	0.7526
互	50	1.69897	0.941195	0.512406	0.266257	0.4213	0.8222
紮	12	1.07918	0.786482	0.244667	-0.22893	0.203	0.8297
丘	7	0.845098	0.75995	0.134606	-0.460387	0.1135	0.8432
襯	29	1.4624	0.879097	0.427247	0.161919	0.3503	0.8199
賤	24	1.38021	0.906228	0.407412	0.174125	0.3397	0.8338
喪	18	1.25527	0.890084	0.339088	0.00297249	0.2848	0.8399
嗨	32	1.50515	0.811634	0.447235	0.203628	0.3526	0.7884
核	30	1.47712	0.827105	0.408417	0.0484869	0.328	0.8031
鮮	33	1.51851	0.858237	0.422703	0.0636902	0.3437	0.8131
護	44	1.64345	0.941954	0.451062	0.0362169	0.3779	0.8378
冊	90	1.95424	0.862329	0.583193	0.273963	0.4511	0.7735
旗	37	1.5682	0.950394	0.47209	0.242162	0.3958	0.8384
煎	22	1.34242	0.862963	0.354137	-0.0397122	0.2996	0.846
肝	43	1.63347	0.626353	0.469343	0.140531	0.3215	0.685
鞭	8	0.90309	0.876475	0.139268	-0.515391	0.1214	0.8717
憾	17	1.23045	0.940058	0.348747	0.0844422	0.2979	0.8542
樁	59	1.77085	0.953115	0.561492	0.413319	0.4561	0.8123
吞	27	1.43136	0.891435	0.427367	0.204349	0.3498	0.8185
轎	9	0.954243	0.719649	0.170983	-0.426724	0.138	0.8071
唔	20	1.30103	0.831503	0.357812	0.0343475	0.2943	0.8225
祭	23	1.36173	0.948076	0.415909	0.241273	0.3524	0.8473
哄	29	1.4624	0.861066	0.424583	0.148678	0.3437	0.8095
錶	31	1.49136	0.994391	0.376151	-0.131074	0.335	0.8906
七	70	1.8451	0.89279	0.510855	0.0615667	0.4118	0.8061
損	14	1.14613	0.999132	0.301118	-0.0386104	0.2639	0.8764
禁	48	1.68124	0.941195	0.510301	0.279696	0.4186	0.8203
盆	34	1.53148	0.968996	0.455468	0.209053	0.3861	0.8477
雌	35	1.54407	0.682982	0.474186	0.285115	0.338	0.7128
柱	31	1.49136	0.872247	0.448097	0.226499	0.3626	0.8092
梯	10	1	0.899629	0.267617	-0.00812896	0.2271	0.8486
哀	19	1.27875	0.832092	0.323575	-0.10578	0.2708	0.8369
爐	33	1.51851	0.963371	0.475826	0.32771	0.3976	0.8356
輩	45	1.65321	0.909037	0.539978	0.464971	0.4329	0.8017
礦	23	1.36173	0.851706	0.380395	0.0647666	0.312	0.8202
喲	57	1.75587	0.814741	0.537743	0.315476	0.4203	0.7816
窘	12	1.07918	0.823909	0.287545	-0.0158229	0.2378	0.827
墜	17	1.23045	0.895172	0.340537	0.0436381	0.2852	0.8375
嬌	15	1.17609	0.896538	0.269799	-0.234659	0.232	0.8599
搥	10	1	0.961777	0.271951	0.0134102	0.2357	0.8667
臣	18	1.25527	0.868702	0.33694	-0.00770443	0.2834	0.8411
啥	34	1.53148	0.88941	0.433846	0.101592	0.3584	0.8261
嗤	6	0.778151	0.642256	0.0959647	-0.562191	0.0761	0.793
驗	27	1.43136	0.91151	0.387912	0.00825608	0.3331	0.8587
柴	27	1.43136	0.859806	0.416082	0.148261	0.3379	0.8121
禿	9	0.954243	0.891773	0.200326	-0.280888	0.1722	0.8596
帥	26	1.41497	0.87844	0.37673	-0.0252225	0.3157	0.838
板	30	1.47712	0.88306	0.42593	0.135527	0.3525	0.8276
逆	12	1.07918	0.894831	0.304734	0.0696036	0.2575	0.845
汝	11	1.04139	0.802995	0.27333	-0.0355339	0.2226	0.8144
掘	19	1.27875	0.95117	0.362699	0.0886645	0.3129	0.8627
喚	15	1.17609	0.906228	0.291535	-0.126628	0.2497	0.8565
懼	19	1.27875	0.954677	0.362051	0.085446	0.3114	0.8601
疑	27	1.43136	0.943858	0.394103	0.0390263	0.3355	0.8513
譜	55	1.74036	0.834459	0.510986	0.203404	0.4	0.7828
捨	37	1.5682	0.94962	0.479177	0.277385	0.4004	0.8356
蚊	24	1.38021	0.812761	0.390075	0.0879623	0.3105	0.796
瞥	12	1.07918	0.795337	0.30381	0.0650127	0.2456	0.8084
獸	19	1.27875	0.845272	0.343233	-0.00807879	0.2843	0.8283
齒	17	1.23045	0.941954	0.349108	0.0862323	0.2973	0.8516
雛	9	0.954243	0.686555	0.154397	-0.509154	0.1229	0.796
歎	11	1.04139	0.804377	0.292659	0.0605306	0.2372	0.8105
彼	40	1.60206	0.92336	0.504511	0.357656	0.4138	0.8202
賭	33	1.51851	0.917215	0.443897	0.169024	0.3695	0.8324
睹	16	1.20412	0.854182	0.330945	0.031455	0.2725	0.8234
閑	11	1.04139	0.88773	0.278354	-0.010564	0.2361	0.8482
啟	21	1.32222	0.907279	0.366952	0.0512125	0.3129	0.8527
潑	18	1.25527	0.836839	0.32288	-0.0775803	0.2677	0.8291
松	20	1.30103	0.940437	0.384101	0.165004	0.3271	0.8516
諒	7	0.845098	0.959398	0.176825	-0.250561	0.1587	0.8975
參	12	1.07918	0.953115	0.290668	-0.000300842	0.2548	0.8766
堪	31	1.49136	0.930332	0.467967	0.325251	0.3864	0.8257
瞄	16	1.20412	0.845272	0.29872	-0.128703	0.2497	0.8359
桃	18	1.25527	0.952336	0.357916	0.0965458	0.3077	0.8597
噗	6	0.778151	0.705754	0.115613	-0.464537	0.0933	0.807
胯	7	0.845098	0.696156	0.173288	-0.268138	0.1374	0.7929
痴	23	1.36173	0.922632	0.409129	0.207574	0.3442	0.8413
幼	26	1.41497	0.889747	0.410984	0.145019	0.3375	0.8212
楞	14	1.14613	0.735654	0.260603	-0.239971	0.2126	0.8158
砸	37	1.5682	0.915066	0.448923	0.127024	0.3731	0.8311
休	26	1.41497	0.883724	0.400874	0.0947699	0.3304	0.8242
厝	36	1.5563	0.89449	0.46949	0.245281	0.3847	0.8194
陷	36	1.5563	0.931072	0.499878	0.396312	0.4102	0.8206
准	50	1.69897	0.873869	0.507903	0.243878	0.4081	0.8035
八	62	1.79239	0.8671	0.524358	0.199726	0.4144	0.7903
束	20	1.30103	0.955068	0.364721	0.0686869	0.3149	0.8634
嘍	32	1.50515	0.70708	0.387591	-0.0928037	0.3036	0.7833
議	39	1.59106	0.880414	0.444227	0.072866	0.3636	0.8185
軸	32	1.50515	0.827397	0.429391	0.114944	0.3442	0.8016
簧	8	0.90309	0.598255	0.101848	-0.701369	0.0777	0.7629
罐	40	1.60206	0.906228	0.479932	0.235497	0.3946	0.8222
縷	10	1	0.87031	0.213976	-0.274725	0.1828	0.8543
崖	12	1.07918	0.759451	0.304249	0.0671953	0.2413	0.7931
症	47	1.6721	0.845272	0.509174	0.286421	0.3996	0.7848
倚	21	1.32222	0.916856	0.401665	0.223735	0.3378	0.841
恰	40	1.60206	0.899629	0.511037	0.390088	0.4121	0.8064
湧	23	1.36173	0.869023	0.394216	0.133455	0.3244	0.8229
呎	46	1.66276	0.823619	0.459416	0.0517113	0.3713	0.8082
影	31	1.49136	0.931814	0.446206	0.217099	0.3716	0.8328
渡	37	1.5682	0.868061	0.465801	0.210907	0.3766	0.8085
腕	11	1.04139	0.803547	0.245301	-0.174838	0.2049	0.8353
仿	36	1.5563	0.856361	0.412808	-0.0364292	0.3352	0.812
健	18	1.25527	0.910095	0.320093	-0.0914334	0.2756	0.861
闊	13	1.11394	0.858237	0.308588	0.0418984	0.2598	0.8419
沖	30	1.47712	0.862646	0.431032	0.160884	0.3503	0.8127
姑	22	1.34242	0.924818	0.414188	0.258744	0.3468	0.8373
疾	14	1.14613	0.908685	0.298032	-0.0539469	0.2575	0.864
瞇	16	1.20412	0.731188	0.313819	-0.0536616	0.2439	0.7772
豎	23	1.36173	0.878112	0.390604	0.115507	0.3251	0.8323
傍	15	1.17609	0.783043	0.297625	-0.0963627	0.2406	0.8084
婦	28	1.44716	0.919734	0.408466	0.0891185	0.3416	0.8363
旋	21	1.32222	0.843451	0.386188	0.146817	0.3154	0.8167
闖	41	1.61278	0.925184	0.495439	0.298109	0.4073	0.8221
葬	23	1.36173	0.860751	0.338698	-0.142468	0.2841	0.8388
馳	8	0.90309	0.787014	0.11285	-0.646691	0.0952	0.8436
植	21	1.32222	0.836839	0.411706	0.273641	0.3306	0.803
祇	60	1.77815	0.91151	0.52455	0.219877	0.4284	0.8167
戳	12	1.07918	0.894831	0.254841	-0.178364	0.2211	0.8676
覽	16	1.20412	0.859492	0.302504	-0.109897	0.2525	0.8347
慾	14	1.14613	0.846185	0.304023	-0.0241746	0.2562	0.8427
聘	42	1.62325	0.835945	0.423351	-0.0742758	0.3568	0.8428
騰	7	0.845098	0.980884	0.149978	-0.38399	0.1354	0.9028
孝	16	1.20412	0.821023	0.309247	-0.076383	0.2555	0.8262
覆	29	1.4624	0.924088	0.439471	0.222669	0.3652	0.831
嫩	24	1.38021	0.930702	0.418684	0.230149	0.3545	0.8467
膩	18	1.25527	0.873219	0.338526	0.000179718	0.2825	0.8345
途	51	1.70757	0.950782	0.541859	0.401049	0.4453	0.8218
源	22	1.34242	0.9859	0.406653	0.221295	0.3496	0.8597
蝦	32	1.50515	0.853562	0.429505	0.115512	0.3482	0.8107
誓	11	1.04139	0.86774	0.263939	-0.0822065	0.2258	0.8555
證	33	1.51851	0.952725	0.451453	0.206576	0.3822	0.8466
雷	12	1.07918	0.802168	0.30022	0.0471687	0.246	0.8194
垂	16	1.20412	0.897223	0.335431	0.0537513	0.2825	0.8422
攜	28	1.44716	0.986741	0.420624	0.149544	0.3614	0.8592
攀	24	1.38021	0.910095	0.427886	0.275883	0.3569	0.8341
授	22	1.34242	0.916856	0.41532	0.264369	0.347	0.8355
窩	32	1.50515	0.841638	0.435079	0.143215	0.3505	0.8056
貧	41	1.61278	0.892451	0.496411	0.302942	0.4011	0.808
眨	16	1.20412	0.865186	0.334822	0.0507243	0.2774	0.8285
幸	47	1.6721	0.822464	0.493271	0.207382	0.3922	0.7951
撫	11	1.04139	0.940437	0.296784	0.0810325	0.2547	0.8582
黏	37	1.5682	0.974285	0.480507	0.283997	0.4055	0.8439
彩	26	1.41497	0.795066	0.398013	0.0805528	0.3245	0.8153
俗	22	1.34242	0.943476	0.414915	0.262355	0.3494	0.8421
妝	24	1.38021	0.842241	0.4333	0.30279	0.3469	0.8006
陸	36	1.5563	0.893469	0.445078	0.123955	0.3667	0.8239
緩	31	1.49136	0.910448	0.454997	0.260792	0.3756	0.8255
豐	32	1.50515	0.878769	0.440701	0.171153	0.3597	0.8162
構	11	1.04139	0.539854	0.176822	-0.515178	0.1271	0.7188
寺	34	1.53148	0.856361	0.403953	-0.0469735	0.3331	0.8246
釘	32	1.50515	0.929962	0.455923	0.246808	0.3791	0.8315
偶	36	1.5563	0.929962	0.44859	0.14141	0.3739	0.8335
蟬	18	1.25527	0.81051	0.375298	0.182939	0.2987	0.7959
聖	24	1.38021	0.94577	0.387149	0.0734199	0.3326	0.8591
啼	18	1.25527	0.843451	0.337567	-0.00458922	0.2791	0.8268
劇	74	1.86923	0.90309	0.580832	0.376824	0.4606	0.793
憂	29	1.4624	0.954677	0.424917	0.15034	0.3605	0.8484
役	70	1.8451	0.619608	0.515991	0.0870964	0.3872	0.7504
鶴	12	1.07918	0.881405	0.300095	0.0465489	0.2528	0.8424
穴	7	0.845098	0.838033	0.188829	-0.190901	0.1599	0.8468
鞘	6	0.778151	0.637895	0.0874548	-0.604485	0.0702	0.8027
融	18	1.25527	0.882729	0.36851	0.1492	0.3059	0.8301
享	50	1.69897	0.930332	0.520709	0.307526	0.4287	0.8233
焦	17	1.23045	0.951558	0.350017	0.0907546	0.3007	0.8591
嗅	7	0.845098	0.943476	0.192373	-0.173284	0.1695	0.8811
勤	30	1.47712	0.897223	0.454089	0.275473	0.3704	0.8157
娘	32	1.50515	0.880085	0.418735	0.0619851	0.3424	0.8177
盜	11	1.04139	0.884389	0.260875	-0.0974375	0.2231	0.8552
符	20	1.30103	0.88306	0.30731	-0.216645	0.2598	0.8454
屢	47	1.6721	0.873869	0.52494	0.364778	0.4178	0.7959
忠	20	1.30103	0.785686	0.315439	-0.176247	0.265	0.8401
祝	54	1.73239	0.925549	0.517313	0.245589	0.4258	0.8231
劫	35	1.54407	0.934794	0.441891	0.124606	0.3711	0.8398
獵	21	1.32222	0.877456	0.387432	0.152998	0.3206	0.8275
銷	23	1.36173	0.819301	0.396894	0.146769	0.3195	0.805
傾	22	1.34242	0.990549	0.401667	0.196511	0.347	0.8639
肘	6	0.778151	0.811072	0.0871247	-0.606126	0.0766	0.8792
判	48	1.68124	0.861697	0.505717	0.256911	0.4025	0.7959
鼠	22	1.34242	0.989276	0.364524	0.0119085	0.3175	0.871
凝	6	0.778151	0.9859	0.124237	-0.421679	0.1119	0.9007
涎	6	0.778151	0.904134	0.10378	-0.52335	0.0928	0.8942
阮	18	1.25527	0.845272	0.344064	0.0277029	0.2843	0.8263
猴	23	1.36173	0.874519	0.367666	0.00150501	0.3077	0.8369
帽	24	1.38021	0.945004	0.441916	0.345611	0.3709	0.8393
伊	60	1.77815	0.74521	0.511453	0.154787	0.3885	0.7596
疊	43	1.63347	0.971836	0.5131	0.358002	0.4289	0.8359
荒	13	1.11394	0.914709	0.276802	-0.116075	0.2365	0.8544
振	20	1.30103	0.948462	0.371362	0.101694	0.319	0.859
昏	17	1.23045	0.902743	0.327531	-0.0210031	0.2766	0.8445
友	45	1.65321	0.974694	0.527978	0.405332	0.4397	0.8328
銜	14	1.14613	0.958213	0.296424	-0.0619384	0.257	0.867
預	44	1.64345	0.853252	0.489619	0.227843	0.3891	0.7947
贈	31	1.49136	0.87844	0.388519	-0.0696054	0.3208	0.8257
攏	16	1.20412	0.942714	0.318129	-0.0322384	0.2755	0.866
欄	29	1.4624	0.920457	0.419806	0.124937	0.351	0.8361
雇	10	1	0.948462	0.226958	-0.210208	0.1997	0.8799
頻	49	1.6902	0.788346	0.429267	-0.135116	0.3526	0.8214
稿	46	1.66276	0.920096	0.535882	0.43175	0.4331	0.8082
闢	63	1.79934	0.873869	0.563916	0.386961	0.4407	0.7815
瞅	8	0.90309	0.758703	0.180293	-0.311495	0.1537	0.8525
逗	31	1.49136	0.857611	0.433937	0.156121	0.3501	0.8068
俯	7	0.845098	0.935542	0.171134	-0.278844	0.1526	0.8917
枉	9	0.954243	0.960189	0.193585	-0.314391	0.172	0.8885
誠	31	1.49136	0.887395	0.451946	0.245626	0.3682	0.8147
酷	26	1.41497	0.957818	0.383403	0.00794268	0.3285	0.8568
詳	26	1.41497	0.940815	0.407605	0.128224	0.3441	0.8442
錄	32	1.50515	0.935917	0.414029	0.0385953	0.3506	0.8468
泛	21	1.32222	0.960983	0.40443	0.237478	0.3451	0.8533
絞	12	1.07918	0.78728	0.266035	-0.122729	0.2219	0.8341
隱	21	1.32222	0.952725	0.401426	0.222547	0.3435	0.8557
漏	30	1.47712	0.921906	0.444915	0.229882	0.3675	0.826
託	34	1.53148	0.919013	0.467435	0.26853	0.3854	0.8245
撈	25	1.39794	0.902743	0.390835	0.0678388	0.3258	0.8336
陳	14	1.14613	0.849551	0.286713	-0.110203	0.2501	0.8723
敷	21	1.32222	0.857298	0.377733	0.104792	0.3162	0.8371
棋	31	1.49136	0.907982	0.458552	0.278461	0.3756	0.8191
窺	30	1.47712	0.897566	0.412195	0.0672595	0.3441	0.8348
扔	28	1.44716	0.844968	0.426382	0.17816	0.3449	0.8089
拚	24	1.38021	0.919734	0.409604	0.185019	0.3412	0.833
巴	14	1.14613	0.916497	0.295737	-0.0653565	0.2525	0.8538
摻	22	1.34242	0.984221	0.379517	0.0864281	0.3287	0.8661
浸	16	1.20412	0.880085	0.312953	-0.0579624	0.2631	0.8407
錫	16	1.20412	0.868702	0.309164	-0.0767949	0.2682	0.8675
九	53	1.72428	0.854804	0.526582	0.302599	0.417	0.7919
延	23	1.36173	0.889747	0.420816	0.26566	0.3465	0.8234
搏	15	1.17609	0.917574	0.264645	-0.260274	0.2295	0.8672
脢	8	0.90309	0.534617	0.13059	-0.558521	0.0914	0.6999
嚷	32	1.50515	0.794525	0.457158	0.252944	0.3516	0.7691
庫	11	1.04139	0.919734	0.270049	-0.0518431	0.2337	0.8654
溝	25	1.39794	0.900665	0.396755	0.0972607	0.3301	0.832
籠	21	1.32222	0.901702	0.405379	0.242197	0.3376	0.8328
斗	11	1.04139	0.811634	0.279155	-0.00658621	0.2298	0.8232
秀	32	1.50515	0.920457	0.449049	0.212643	0.3706	0.8253
籤	27	1.43136	0.859806	0.390253	0.0198894	0.3259	0.8351
鑿	14	1.14613	0.889074	0.306724	-0.0107487	0.2632	0.8581
岔	8	0.90309	0.838632	0.148249	-0.470758	0.1257	0.8479
廢	39	1.59106	0.922996	0.471614	0.208977	0.3896	0.8261
裂	20	1.30103	0.977159	0.350459	-0.00219315	0.309	0.8817
鹿	30	1.47712	0.897909	0.430508	0.15828	0.3556	0.826
器	36	1.5563	0.869023	0.460596	0.20108	0.3723	0.8083
賽	48	1.68124	0.779369	0.460788	0.0336147	0.3637	0.7893
鉅	30	1.47712	0.809949	0.457341	0.29164	0.3554	0.7771
覓	24	1.38021	0.92336	0.413895	0.206347	0.3497	0.8449
削	14	1.14613	0.808829	0.29231	-0.0823894	0.2387	0.8166
划	26	1.41497	0.886391	0.390449	0.0429585	0.3254	0.8334
稠	15	1.17609	0.967784	0.292315	-0.122755	0.2575	0.8809
粘	14	1.14613	0.913996	0.266167	-0.212316	0.2346	0.8814
爆	10	1	0.850781	0.224434	-0.222748	0.1905	0.8488
髮	26	1.41497	0.937418	0.40142	0.0974863	0.3392	0.845
恩	15	1.17609	0.942714	0.310753	-0.0311169	0.2679	0.8621
獻	26	1.41497	1.01954	0.421361	0.196594	0.3665	0.8698
益	27	1.43136	0.936291	0.423824	0.186738	0.3558	0.8395
邪	11	1.04139	0.839531	0.29978	0.0959247	0.2457	0.8196
旺	24	1.38021	0.933301	0.40512	0.162733	0.345	0.8516
刃	7	0.845098	0.846185	0.16371	-0.315742	0.1421	0.868
祖	17	1.23045	0.93442	0.331427	-0.00163918	0.284	0.8569
志	28	1.44716	0.899629	0.42029	0.147884	0.348	0.828
遙	14	1.14613	1.02	0.287454	-0.106524	0.255	0.8871
徑	7	0.845098	0.737312	0.123251	-0.516825	0.1048	0.8503
評	23	1.36173	0.977159	0.410539	0.21458	0.3545	0.8635
詢	15	1.17609	0.917933	0.314684	-0.0115802	0.2756	0.8758
睏	8	0.90309	0.799697	0.110234	-0.659689	0.0936	0.8491
鈣	14	1.14613	0.691863	0.15912	-0.744342	0.1346	0.8459
斥	10	1	0.952336	0.257753	-0.0571531	0.2244	0.8706
罕	10	1	0.810229	0.198117	-0.353549	0.1683	0.8495
欺	15	1.17609	0.928118	0.306096	-0.0542599	0.2626	0.8579
挽	11	1.04139	1.06198	0.288382	0.0392767	0.2594	0.8995
畏	18	1.25527	0.925184	0.352313	0.0686998	0.3001	0.8518
勞	30	1.47712	0.994819	0.417978	0.0960023	0.3613	0.8644
標	32	1.50515	0.942334	0.443325	0.184194	0.3739	0.8434
弟	26	1.41497	0.932185	0.396941	0.0752263	0.3426	0.8631
頰	8	0.90309	0.748849	0.136563	-0.528834	0.1119	0.8194
并	18	1.25527	0.746904	0.324335	-0.0703526	0.2583	0.7964
陡	27	1.43136	0.862329	0.402529	0.0809055	0.331	0.8223
泊	8	0.90309	0.775467	0.146777	-0.478073	0.1209	0.8237
昇	26	1.41497	0.959793	0.392741	0.05435	0.3376	0.8596
襲	23	1.36173	0.870632	0.401487	0.169592	0.3295	0.8207
拎	21	1.32222	0.785686	0.410646	0.268372	0.3217	0.7834
訴	27	1.43136	0.774432	0.387072	0.00408267	0.3054	0.789
資	29	1.4624	0.891435	0.446229	0.25626	0.3639	0.8155
訊	15	1.17609	0.924453	0.273816	-0.214692	0.24	0.8765
畜	13	1.11394	0.841336	0.298901	-0.00624293	0.2503	0.8374
稀	25	1.39794	0.943095	0.421323	0.219364	0.3529	0.8376
撤	12	1.07918	0.853252	0.274798	-0.079176	0.2316	0.8428
狹	14	1.14613	0.842543	0.306706	-0.0108378	0.2584	0.8425
扒	7	0.845098	0.954286	0.199296	-0.13888	0.1754	0.8801
奏	20	1.30103	0.909037	0.383703	0.163028	0.3235	0.8431
瞟	7	0.845098	0.827105	0.185242	-0.208724	0.1559	0.8416
叢	18	1.25527	0.800519	0.354441	0.0792792	0.2849	0.8038
澎	17	1.23045	0.789414	0.306224	-0.126899	0.2519	0.8226
阻	7	0.845098	0.798057	0.113855	-0.56352	0.1005	0.8827
劈	12	1.07918	0.882729	0.278702	-0.0597747	0.2379	0.8536
啃	16	1.20412	0.817015	0.272464	-0.259194	0.2262	0.8302
嵌	11	1.04139	0.894149	0.273868	-0.0328595	0.2335	0.8526
償	15	1.17609	0.831797	0.296328	-0.10281	0.2445	0.8251
皇	9	0.954243	0.950782	0.205359	-0.255871	0.1801	0.877
叉	15	1.17609	0.747875	0.313817	-0.015889	0.2562	0.8164
亭	8	0.90309	0.628378	0.125291	-0.584856	0.0968	0.7726
餌	10	1	0.870955	0.212298	-0.283068	0.1823	0.8587
耕	16	1.20412	0.79588	0.30627	-0.0911813	0.2633	0.8597
困	22	1.34242	0.896196	0.419959	0.287423	0.3476	0.8277
界	43	1.63347	0.920819	0.519479	0.389707	0.4227	0.8137
恤	28	1.44716	0.958607	0.31736	-0.363677	0.2775	0.8744
習	29	1.4624	0.853252	0.413755	0.0948617	0.3363	0.8128
糞	21	1.32222	0.884722	0.378825	0.11022	0.312	0.8236
粉	26	1.41497	0.924818	0.402253	0.101623	0.3393	0.8435
營	33	1.51851	0.846795	0.442396	0.161562	0.3575	0.8081
究	35	1.54407	0.779892	0.472861	0.278528	0.3598	0.7609
秤	10	1	0.894149	0.229717	-0.196493	0.1965	0.8554
察	20	1.30103	0.931814	0.39879	0.238013	0.3363	0.8433
驅	15	1.17609	0.952725	0.321292	0.0212614	0.2766	0.8609
堤	10	1	0.909037	0.190536	-0.391225	0.1675	0.8791
脆	16	1.20412	0.864549	0.294237	-0.150984	0.2466	0.8381
序	33	1.51851	0.948462	0.443889	0.168984	0.373	0.8403
嘗	29	1.4624	0.895854	0.415759	0.104821	0.3435	0.8262
蹦	12	1.07918	0.813609	0.247788	-0.21342	0.2072	0.8362
癒	28	1.44716	0.807433	0.390816	0.00139697	0.3234	0.8275
雅	15	1.17609	0.93968	0.320261	0.0161374	0.2752	0.8593
乳	10	1	0.872571	0.190542	-0.391196	0.1664	0.8733
趣	13	1.11394	0.875496	0.26866	-0.156542	0.2264	0.8427
閩	23	1.36173	0.868381	0.396458	0.144601	0.3291	0.8301
恥	15	1.17609	0.910095	0.29845	-0.0922618	0.2561	0.8581
斑	16	1.20412	0.865504	0.269708	-0.272895	0.2306	0.855
甘	14	1.14613	0.869023	0.279574	-0.145687	0.2387	0.8538
鉛	18	1.25527	0.887395	0.355163	0.0828632	0.2972	0.8368
掏	11	1.04139	0.975514	0.264788	-0.077986	0.2359	0.8909
煉	9	0.954243	0.734475	0.196211	-0.301337	0.1564	0.7971
慧	22	1.34242	0.726073	0.38299	0.103686	0.2972	0.776
斧	10	1	1.10791	0.260679	-0.0426118	0.238	0.913
洲	17	1.23045	0.891435	0.325691	-0.0301495	0.277	0.8505
岩	10	1	0.737549	0.221761	-0.236035	0.1763	0.795
憋	6	0.778151	0.851706	0.127834	-0.403802	0.1094	0.8558
悔	13	1.11394	0.919013	0.295723	-0.0220396	0.2579	0.8721
漆	29	1.4624	0.962574	0.442467	0.237563	0.373	0.843
甭	12	1.07918	0.85855	0.2882	-0.0125703	0.2435	0.8449
柔	21	1.32222	0.94962	0.404032	0.235501	0.3427	0.8482
葷	7	0.845098	0.891435	0.188821	-0.190939	0.1635	0.8659
階	21	1.32222	0.903785	0.355066	-0.00785886	0.3017	0.8497
譯	27	1.43136	0.917574	0.401595	0.0762632	0.3373	0.8399
擅	37	1.5682	0.909389	0.45802	0.172235	0.3775	0.8242
燉	20	1.30103	0.737075	0.329799	-0.104874	0.2613	0.7923
瘡	9	0.954243	0.842846	0.212397	-0.220894	0.1775	0.8357
扁	14	1.14613	0.791827	0.240338	-0.340688	0.199	0.828
署	26	1.41497	0.757707	0.347783	-0.16909	0.2824	0.812
踱	6	0.778151	0.689944	0.120899	-0.43827	0.0958	0.7924
洽	59	1.77085	0.702896	0.45002	-0.140698	0.3354	0.7453
溯	23	1.36173	0.823909	0.392046	0.122673	0.3194	0.8147
祂	20	1.30103	0.92775	0.39969	0.242485	0.3355	0.8394
謹	37	1.5682	0.738024	0.438967	0.0775395	0.333	0.7586
豹	16	1.20412	0.921543	0.290819	-0.167973	0.2515	0.8648
咧	16	1.20412	0.809108	0.298639	-0.129105	0.2436	0.8157
忌	21	1.32222	0.9813	0.397962	0.20533	0.3436	0.8634
讚	9	0.954243	0.903438	0.209232	-0.236624	0.1795	0.8579
于	33	1.51851	0.958213	0.449421	0.196478	0.3803	0.8462
喉	14	1.14613	0.831797	0.305026	-0.0191896	0.2543	0.8337
恆	13	1.11394	1.01457	0.276154	-0.119298	0.2447	0.8861
態	7	0.845098	0.941954	0.203742	-0.116781	0.1775	0.8712
墓	37	1.5682	0.852633	0.389327	-0.16917	0.321	0.8245
啜	7	0.845098	0.933301	0.197319	-0.148705	0.1722	0.8727
逞	8	0.90309	0.98506	0.134651	-0.538336	0.1219	0.9053
納	15	1.17609	0.89449	0.285226	-0.157987	0.2419	0.8481
蠢	7	0.845098	0.951947	0.190514	-0.182525	0.1683	0.8834
斯	21	1.32222	0.88706	0.405129	0.240955	0.3333	0.8227
戀	20	1.30103	0.891435	0.397141	0.229814	0.3278	0.8254
砌	11	1.04139	0.872571	0.27702	-0.0171957	0.2335	0.8429
俾	27	1.43136	0.731422	0.401263	0.0746131	0.3176	0.7915
警	30	1.47712	0.710411	0.383657	-0.0745742	0.2986	0.7783
驢	10	1	0.927383	0.215516	-0.267072	0.1889	0.8765
檐	7	0.845098	0.61997	0.168819	-0.290349	0.1268	0.7511
漢	18	1.25527	0.994819	0.350142	0.0579126	0.3076	0.8785
違	16	1.20412	0.857298	0.324478	-0.000686791	0.2687	0.8281
袋	32	1.50515	1.01278	0.464777	0.290813	0.3985	0.8574
誘	16	1.20412	0.934794	0.324898	0.00140181	0.2786	0.8575
債	14	1.14613	0.898597	0.303711	-0.0257222	0.2635	0.8676
徵	67	1.82607	0.703993	0.480412	-0.0640929	0.3642	0.7581
蒸	13	1.11394	0.821311	0.237095	-0.313422	0.1975	0.833
兔	17	1.23045	0.870955	0.326048	-0.028374	0.273	0.8373
援	8	0.90309	0.912929	0.134955	-0.536828	0.1193	0.884
僧	27	1.43136	0.850473	0.407362	0.104923	0.332	0.815
基	13	1.11394	0.84588	0.259359	-0.202768	0.221	0.8521
晒	35	1.54407	0.926648	0.446557	0.147795	0.3735	0.8364
殊	14	1.14613	0.943858	0.281375	-0.136735	0.2464	0.8757
責	43	1.63347	0.939302	0.513379	0.359389	0.4221	0.8222
訓	17	1.23045	0.84436	0.308881	-0.113696	0.2619	0.8479
轟	12	1.07918	0.88941	0.314299	0.117144	0.2653	0.8441
町	10	1	0.653256	0.215769	-0.265817	0.1642	0.761
弓	19	1.27875	0.896196	0.373399	0.141845	0.3119	0.8353
掀	9	0.954243	0.762708	0.185728	-0.353441	0.1598	0.8604
潔	14	1.14613	0.91364	0.276232	-0.162298	0.2372	0.8587
洋	22	1.34242	0.894831	0.395159	0.164169	0.3298	0.8346
蹬	9	0.954243	0.82594	0.193005	-0.317269	0.1617	0.8378
腸	13	1.11394	0.990124	0.30107	0.00453734	0.2672	0.8875
齣	67	1.82607	0.8471	0.554249	0.302882	0.4337	0.7825
旱	19	1.27875	0.784627	0.298303	-0.23138	0.2444	0.8193
拭	6	0.778151	0.913996	0.12561	-0.414851	0.1106	0.8805
晴	29	1.4624	0.831208	0.418141	0.116661	0.3356	0.8026
筒	11	1.04139	0.930702	0.205177	-0.374257	0.1839	0.8963
栽	27	1.43136	0.98632	0.405577	0.0960537	0.3505	0.8642
噯	8	0.90309	0.594312	0.0930892	-0.744901	0.0722	0.7756
舒	11	1.04139	0.860751	0.286022	0.0275428	0.2394	0.837
蜜	13	1.11394	0.845272	0.287959	-0.060628	0.2456	0.8529
溶	15	1.17609	0.918653	0.310106	-0.0343328	0.2639	0.851
概	18	1.25527	0.864231	0.359249	0.103175	0.2948	0.8206
莖	26	1.41497	0.801618	0.389012	0.0358194	0.3151	0.81
貌	18	1.25527	0.925915	0.353638	0.0752888	0.3013	0.852
凶	15	1.17609	0.946154	0.302848	-0.0704045	0.2616	0.8638
殘	22	1.34242	0.876802	0.41253	0.250504	0.3391	0.822
政	34	1.53148	0.857298	0.428641	0.0757242	0.352	0.8212
瓜	14	1.14613	1.007	0.320782	0.0591196	0.2871	0.895
頒	15	1.17609	0.86774	0.293722	-0.11576	0.2489	0.8474
竊	19	1.27875	0.884722	0.340413	-0.0220953	0.2869	0.8428
誇	10	1	0.993962	0.264515	-0.0235452	0.2328	0.8801
勇	24	1.38021	1.01909	0.396463	0.119707	0.3452	0.8707
榜	25	1.39794	0.868702	0.408957	0.157906	0.3333	0.815
嚥	13	1.11394	0.886391	0.301001	0.00419429	0.2585	0.8588
干	9	0.954243	0.93442	0.209915	-0.233229	0.1825	0.8694
俟	48	1.68124	0.793984	0.517472	0.315333	0.3954	0.7641
倦	11	1.04139	0.970616	0.288089	0.0378181	0.2513	0.8723
塌	10	1	0.910448	0.228285	-0.203612	0.1979	0.8669
櫃	18	1.25527	0.88773	0.340007	0.00754054	0.287	0.8441
胎	25	1.39794	0.943858	0.411284	0.169469	0.347	0.8437
澀	12	1.07918	0.809388	0.224633	-0.328496	0.1915	0.8525
溢	9	0.954243	1.00261	0.214689	-0.209504	0.1903	0.8864
統	18	1.25527	0.870955	0.372982	0.171427	0.3073	0.8239
棉	11	1.04139	0.843451	0.227718	-0.262226	0.1929	0.8471
育	18	1.25527	0.897566	0.326907	-0.0575655	0.2798	0.8559
壇	8	0.90309	1.08619	0.153334	-0.445483	0.1405	0.9163
瀉	8	0.90309	0.895513	0.151526	-0.454471	0.1306	0.8619
砂	19	1.27875	0.884389	0.33306	-0.0586386	0.2845	0.8542
虞	31	1.49136	0.889747	0.418982	0.0817986	0.3483	0.8313
孤	20	1.30103	0.927383	0.345369	-0.0274944	0.2994	0.8669
燕	8	0.90309	0.84863	0.144597	-0.488908	0.1235	0.8541
倘	22	1.34242	0.795337	0.38362	0.106816	0.3082	0.8034
爪	13	1.11394	0.967784	0.314263	0.0701036	0.2741	0.8722
谷	19	1.27875	0.799423	0.376199	0.155762	0.2981	0.7924
裸	7	0.845098	0.884057	0.145975	-0.403886	0.1291	0.8844
舖	24	1.38021	0.934794	0.398008	0.127386	0.3356	0.8432
繁	19	1.27875	0.996109	0.34632	0.00726229	0.3049	0.8804
蟹	12	1.07918	0.895513	0.277513	-0.0656863	0.2383	0.8587
邦	14	1.14613	0.841939	0.245676	-0.314157	0.2074	0.8442
厭	17	1.23045	0.946537	0.342698	0.0543764	0.2952	0.8614
惜	19	1.27875	0.863279	0.35722	0.0614363	0.2976	0.8331
冤	11	1.04139	0.924453	0.276948	-0.0175526	0.2392	0.8637
劑	28	1.44716	0.825068	0.313818	-0.381281	0.2648	0.8438
效	34	1.53148	0.884057	0.452163	0.19263	0.371	0.8205
脈	25	1.39794	0.886391	0.400048	0.11363	0.3306	0.8264
瀕	12	1.07918	0.793444	0.29427	0.0175981	0.2388	0.8115
嶺	10	1	0.863914	0.194544	-0.371304	0.1683	0.8651
肖	11	1.04139	0.845272	0.205119	-0.374542	0.1787	0.8712
薪	17	1.23045	0.879755	0.330312	-0.00717982	0.277	0.8386
播	27	1.43136	0.918293	0.394693	0.041958	0.3317	0.8404
欣	7	0.845098	0.973467	0.201587	-0.12749	0.1778	0.882
辯	20	1.30103	0.92775	0.393554	0.211987	0.3309	0.8408
牢	24	1.38021	0.882729	0.391031	0.0927121	0.3235	0.8273
韓	49	1.6902	0.781202	0.518255	0.307155	0.3932	0.7587
倉	9	0.954243	0.87517	0.158788	-0.487329	0.1384	0.8716
眩	11	1.04139	0.405718	0.159315	-0.602191	0.0986	0.6189
敝	8	0.90309	0.752272	0.140557	-0.508987	0.1222	0.8694
玄	9	0.954243	0.866461	0.23574	-0.10488	0.2054	0.8713
醬	7	0.845098	0.728391	0.166381	-0.302467	0.1358	0.8162
息	29	1.4624	0.876802	0.418133	0.116622	0.3445	0.8239
矛	15	1.17609	0.914709	0.287388	-0.147242	0.2527	0.8793
繡	11	1.04139	0.921543	0.22936	-0.254066	0.2028	0.8842
速	17	1.23045	0.816445	0.346954	0.0755283	0.2819	0.8125
麥	7	0.845098	0.896538	0.103242	-0.616267	0.0898	0.8698
蓮	6	0.778151	0.824488	0.0802683	-0.640203	0.0718	0.8945
伐	9	0.954243	0.842241	0.154552	-0.508385	0.1331	0.8612
潭	9	0.954243	0.825068	0.205156	-0.256882	0.1711	0.834
澳	26	1.41497	0.878112	0.414128	0.160645	0.3453	0.8338
柳	13	1.11394	0.833866	0.268988	-0.154914	0.2256	0.8387
超	14	1.14613	0.906578	0.294961	-0.0692136	0.2511	0.8513
屎	11	1.04139	0.751291	0.240713	-0.197641	0.1931	0.8022
撮	8	0.90309	0.829152	0.136258	-0.530353	0.1168	0.8572
囊	9	0.954243	0.90101	0.177985	-0.391919	0.1562	0.8776
憤	25	1.39794	0.870632	0.381917	0.0235156	0.3168	0.8295
盾	7	0.845098	0.788612	0.120154	-0.532216	0.1063	0.8847
逐	46	1.66276	0.946922	0.532444	0.414661	0.439	0.8245
糊	10	1	0.980053	0.264461	-0.023816	0.2318	0.8765
犁	6	0.778151	0.720333	0.0606481	-0.737715	0.0524	0.864
鬢	7	0.845098	0.838632	0.193318	-0.168587	0.1626	0.8411
堅	29	1.4624	0.92775	0.433023	0.190624	0.3627	0.8376
閏	18	1.25527	0.815309	0.367146	0.142419	0.2939	0.8005
疏	19	1.27875	0.930332	0.327992	-0.0838296	0.2804	0.8549
碧	6	0.778151	0.741602	0.117258	-0.456362	0.0958	0.817
嗜	24	1.38021	0.832387	0.416605	0.219814	0.3367	0.8082
悟	19	1.27875	0.848937	0.363881	0.0945402	0.2978	0.8184
潤	8	0.90309	0.972243	0.152945	-0.447416	0.1358	0.8879
胡	7	0.845098	0.89279	0.192781	-0.171258	0.1661	0.8616
務	13	1.11394	0.941574	0.316357	0.0805134	0.2727	0.862
叨	6	0.778151	0.80799	0.122759	-0.429023	0.1034	0.8423
愣	17	1.23045	0.804377	0.315224	-0.0821691	0.2553	0.8099
痣	17	1.23045	0.866461	0.315255	-0.0820173	0.2668	0.8463
祗	16	1.20412	0.610302	0.209238	-0.573428	0.1599	0.7642
籐	8	0.90309	0.73471	0.132247	-0.550288	0.1152	0.8711
漂	11	1.04139	0.894149	0.213286	-0.333952	0.1875	0.8791
賬	9	0.954243	0.744727	0.158293	-0.489793	0.1298	0.82
濺	14	1.14613	0.799971	0.298453	-0.0518547	0.247	0.8276
履	6	0.778151	0.954677	0.11909	-0.447258	0.1068	0.8968
御	7	0.845098	0.784891	0.14096	-0.428809	0.121	0.8584
競	11	1.04139	0.954286	0.247418	-0.164317	0.218	0.8811
揭	7	0.845098	0.889747	0.175391	-0.257688	0.1538	0.8769
瞎	13	1.11394	0.946154	0.307675	0.0373614	0.271	0.8808
叮	11	1.04139	0.827397	0.260667	-0.0984672	0.2187	0.839
暴	13	1.11394	0.933674	0.317178	0.0845926	0.2729	0.8604
塵	19	1.27875	0.939302	0.36844	0.117198	0.3138	0.8517
帆	10	1	0.783306	0.226202	-0.213963	0.1863	0.8236
紋	15	1.17609	0.855115	0.271711	-0.225157	0.2284	0.8406
策	30	1.47712	0.955852	0.435159	0.181392	0.3671	0.8436
叩	9	0.954243	0.871278	0.17303	-0.416546	0.15	0.8669
撰	18	1.25527	0.814741	0.343382	0.0243156	0.2802	0.816
嬸	11	1.04139	0.488518	0.0950495	-0.921591	0.072	0.7575
良	22	1.34242	0.980053	0.410477	0.2403	0.3526	0.859
艷	9	0.954243	0.831797	0.16721	-0.445471	0.1435	0.8582
嗔	7	0.845098	0.848324	0.181786	-0.225901	0.1553	0.8543
宿	11	1.04139	0.986741	0.259951	-0.10203	0.2312	0.8894
抑	8	0.90309	0.784098	0.157773	-0.423423	0.1292	0.8189
棺	11	1.04139	0.849858	0.188005	-0.459603	0.163	0.867
荷	16	1.20412	0.942714	0.310575	-0.069785	0.2702	0.87
遣	10	1	0.888737	0.218376	-0.252858	0.188	0.8609
毋	20	1.30103	0.76045	0.317396	-0.166521	0.2569	0.8094
啄	6	0.778151	0.733533	0.0660692	-0.710773	0.0575	0.8703
盲	18	1.25527	0.871278	0.291791	-0.232093	0.2538	0.8698
繭	13	1.11394	0.92775	0.316994	0.083677	0.2729	0.8609
恭	14	1.14613	0.886057	0.288354	-0.102046	0.2434	0.8441
鋅	12	1.07918	0.84863	0.260335	-0.151059	0.2223	0.8539
維	27	1.43136	0.88941	0.395701	0.0469702	0.3314	0.8375
[truncated: 419 more rows]
